# Supplementary material
Source: MDPI journal article supplement (https://www.mdpi.com/2071-1050/9/4/670)
Supplement: s1 [file s1]

## Sheet: Papers in review
Author	Year	Title	Source	type of source	country	type of study	case study?	Economic pillar?	Environmental Pillar?	Social Pillar?	industry sector	method development?	framework development?	thematic field	short summary of paper	further research needs
Klöpffer, W.	2003	Life-Cycle based methods for sustainable product development.	The International Journal of Life Cycle Assessment	Editorial	Germany	theoretical	no	x	x	x	-	yes	yes	Framework	Development of the idea of LCSA as a combination of LCA, LCC and SLCA as complementary tools with the same system boundaries	Further development of SLCA; integration of the 3 tools
Zhou, Z., Jiang, H., & Qin, L.	2007	Life cycle sustainability assessment of fuels.	Fuel	Journal Article	China	both	numerical example	x	x		Fuels	yes	no	Alternative Assessment Methods	Application of multi-criteria analysis to several fuel types by choosing 4 indicators (economic, environmental, energy, renewability). The evaluation is on a relativ basis, setting the worst performing alternative in one indicator as 0, and the best as 1, assuming a linear distribution between best and worst performance. LCC (end-consumer) is used to evaluate the economic dimension and GWP for th…	not mentioned
Klöpffer, W.	2008	Life cycle sustainability assessment of products.	The International Journal of Life Cycle Assessment	Journal Article	Germany	theoretical	no	x	x	x	-	yes	yes	Framework	Furhter elaboration on the idea of LCSA as a combination of LCA, LCC and SLCA as complementary tools with the same system boundaries which can be achieved following two options. Option 1: complementary carrying out of LCA, LCC and SLCA. Option 2: Carrying out three different impact assessments (environmental, economic and social) of the same life cycle inventory	Main research need in the field of SLCA (how to limit and quantify the plethora of proposed indicators, how to get the needed regionalized data), LCA is also in need for more regionalized data
Heijungs, R., Huppes, G., & Guinée, J. B.	2009	A scientific framework for LCA.	Technical report of CALCAS project	Report	Netherlands	theoretical	no	x	x	x	-	yes	yes	Framework	Report of a research project that aims at restructuring the LCA framework, enabling an integrated sustainability assessment. The proposal is to merge the inventory and interpretation phase into one modelling phase and extend the model by three separate assessments for environment, economy and social (analogous to extended I/O-analysis) thus promoting the use of one LCI.	empirical and normative elements
Azapagic, A., & Stichnothe, H.	2010	Life cycle sustainability assessment of biofuels.	Handbook of Biofuels Production	Book Chapter	UK	both	full case study	x	x		Fuels	yes	no	Alternative Assessment Methods	Assessment of second generation biodiesel production for a range of feedstock using LCA studies from different authors for the environmental dimension. The economic dimension is assessed by taking production and delivery costs for the feedstock from several other studies/authors as well as the capital investment costs for different biodiesel production technologies. Furthermore, the prices for bi…	not mentioned
Brandão, M., Clift, R., Canals, L. M. i, & Basson, L.	2010	A Life-Cycle Approach to Characterising Environmental and Economic Impacts of Multifunctional Land-Use Systems: An Integrated Assessment in the UK.	Sustainability	Journal Article	UK	empirical	full case study	x	x		Agriculture	no	no	Case Studies	Case study employing LCA and LCC to evaluate the effects of different crops on land use. LCA focuses on GWP on the several stages of farming the respective crop by focusing on the changes in carbon stock of the soil whereas LCC focuses on the costs for these steps born by the farmer	not mentioned
Finkbeiner, M., Schau, E. M., Lehmann, A., & Traverso, M.	2010	Towards Life Cycle Sustainability Assessment.	Sustainability	Journal Article	Germany	theoretical	no	x	x	x	-	no	no	Framework	Overview of the state-of-the-art of LCSA components LCA, LCC and SLCA. Adaption of Maslow's pyramid of needs to the hierarchy of sustainability assessment approaches (with LCSA on top). Introduction of two presentation tools for LCSA results: Life Cycle Sustainability Triangle and Life Cycle Sustainability Dashboard	Methodological research needed for: weighting and aggregation within LCSA; SLCA (challenge of affluence of indicators and difficulty of quantification and relation to product); LCC (challenge of how to integrate several viewpoints)
Heijungs, R., Huppes, G., & Guinée, J. B.	2010	Life cycle assessment and sustainability analysis of products, materials and technologies - Toward a scientific framework for sustainability life cycle analysis.	Polymer Degradation and Stability	Journal Article	Netherlands	theoretical	no	x	x	x	-	yes	yes	Framework	Shorter introduction of a new sustainability assessment framework that has been developed in the CALCAS project. It amends the ISO LCA framework to separate technical models from normative interpretations but groups those steps together in one modelling phase. Several models are discussed for addressing satellite accounts like meso-economical models or cultural/institutional models and ethical va…	not mentioned
Moriizumi, Y., Matsui, N., & Hondo, H.	2010	Simplified life cycle sustainability assessment of mangrove management: a case of plantation on wastelands in Thailand.	Journal of Cleaner Production	Journal Article	Japan	both	full case study	x	x	x	Agriculture	yes	no	Alternative Assessment Methods	Development of an assessment method based on LCA to assess the more sustainable management option for a mangrove forest (conservation or charcoal production). They used one indicator per sustainability dimension (CO2 sequestration, employment creation, cash flow) for the assessment and presented them without aggregation or weighting. Thus, preservation is more beneficial from the environmental pe…	not mentioned
Guinée, J. B., Heijungs, R., Huppes, G., Zamagni, A., Masoni, P., Buonamici, R., … Rydberg, T.	2011	Life Cycle Assessment: Past, Present, and Future.	Environmental Science & Technology	Journal Article	Netherlands	theoretical	no	x	x	x	-	no	yes	Framework	Explanatory framework that shows the different foci and scopes that Life Cycle Sustainability Analysis (LCSA) can take (from product to sectoral level and from one to several sustainability dimensions). LCSA is rather a framework of models than a model itself.	Making the LCSA framework operational; derive consistent criteria for implementing methods in relation to specific life-cycle based questions; choice of attributional, consequential, and scenario-based modeling of systems and related time-frames; new generation of ISO- type guidelines and LCSA handbooks
Halog, A., Manik, Y.	2011	Advancing Integrated Systems Modelling Framework for Life Cycle Sustainability Assessment.	Sustainability	Journal Article	USA	theoretical	no	x	x	x	-	yes	yes	Multi-Criteria Decision Analysis	Development of a framework for designing and carrying out of LCSA. Multi-criteria decision models like Analytical Hierarchy Process (AHP) should be used to prioritize indicators (to make use of the pareto principle, i.e. yielding 80% of the results with 20% of effort), system dynamics and agent-based modelling techniques shall support the analysis of interdependencies of influencing factors in a …	Integration of the several framework components using a computational structure in communication technologies such as cyberinfrastructure
UNEP/SETAC Life Cycle Initiative.	2011	Towards a Life Cycle Sustainability Assessment - Making informed choices on products.	UNEP/SETAC Life Cycle Initiative	Report	France	both	full case study	x	x	x	Multiple	no	yes	Framework	Guidance document that lists the current state-of-the-art of LCSA and gives guidance on how to conduct LCSA as well as more details on the individual assessment tools. Several case studies are presented to better illustrate the method.	Conduct more case studies and acquire more data; discuss LCSA principles that help to interpret results, especially regarding trade-offs; combine dimensions more fluently and develop streamlined approaches for faster overall picture; clearer format of communication; conduct more research around double-counting
Ghadimi, P., Azadnia, A. H., Mohd Yusof, N., & Mat Saman, M. Z.	2012	A weighted fuzzy approach for product sustainability assessment: a case study in automotive industry.	Journal of Cleaner Production	Journal Article	Malaysia	both	numerical example	x	x	x	Automotive	yes	no	Multi-Criteria Decision Analysis	Introduction of fuzzy evaluation methods in order to weight sustainability indicators when aggregating them into a final sustainability score for the assessment of products and manufacturing. Fuzzy evaluation methods translates the judgment of inhouse specialists and decision makers into metrics. A rather simple case study showing the effects of changing a raw material for an automotive component…	"For future work, a hybrid methodology could be proposed in order to assess the sustainability level of both manufacturing process and manufactured product with covering the supply chain stages of the whole system."
Jeswani, H., Azapagic, A.	2012	Life cycle sustainability assessment of second generation biodiesel.	Advances in Biodiesel Production	Book Chapter	UK	both	full case study	x	x		Fuels	yes	no	Alternative Assessment Methods	Very similar study to Azapagic&Stichnothe (2010). Assessment of second generation biodiesel production for a range of feedstock using LCA studies from different authors for the environmental dimension. The economic dimension is assessed by taking production and delivery costs for the feedstock from several other studies/authors as well as the capital investment costs for different biodiesel produ…	not mentioned
Manzardo, A., Ren, J., Mazzi, A., & Scipioni, A.	2012	A grey-based group decision-making methodology for the selection of hydrogen technologies in life cycle sustainability perspective.	International Journal of Hydrogen Energy	Journal Article	Italy	both	full case study	x	x	x	Fuels	yes	no	Multi-Criteria Decision Analysis	Further development of grey relation analysis in order to evaluate linguistic assessments of several groups of specialists. Different scenarios for hydrogen generation were previously assessed using LCSA (though none of the results are presented so no judgment on the studies can be made) and submitted to three groups of experts that gave linguistic assessment on the importance of the sustainabili…	Choose suitable and specific criteria for/in LCC, LCA, SLCA
Nzila, C., Dewulf, J., Spanjers, H., Tuigong, D., Kiriamiti, H., & van Langenhove, H.	2012	Multi criteria sustainability assessment of biogas production in Kenya.	Applied Energy	Journal Article	Belgium	both	full case study	x	x		Energy	yes	no	Alternative Assessment Methods	Application of economic, environmental and technical assessment, thus technically a multi-criteria assessment to biogas production in Kenya. Environmental assessment is based on LCA (simapro + ecoinvent), the economic and technical dimension are assessed using a newly developed set of indicators. Social performance was of interest but excluded due to lack of consensus on method. Results were not …	Ranking of sustainability criteria
Schau, E. M., Traverso, M., & Finkbeiner, M.	2012	Life cycle approach to sustainability assessment: a case study of remanufactured alternators.	Journal of Remanufacturing	Journal Article	Germany	empirical	full case study	x	x	x	Automotive	no	no	Case Studies	Application of LCSA to evaluate three design alternatives of alternators (conventional, lightweight, ultra-lightweight) in regards to the remanufacturing step. LCA was conducted using GaBi4.0 and CML2001, LCC used literature and primary data. The conventional alternative performed best when looking at LCA and LCC. SLCA used data from the Social Hotspot Database (SHDB) and evaluated Germany, India…	In LCC, the relation between wages (which are costs for one but income or another) should be looked at; in SLCA, suitable indicators should be identified that coul also serve as baseline indicators for social assessment in order to enable comparability
Schulz, M., Short, M. D., & Peters, G. M.	2012	A streamlined sustainability assessment tool for improved decision making in the urban water industry.	Integrated Environmental Assessment and Management	Journal Article	Australia	both	full case study	x	x		Water treatment	yes	no	Alternative Assessment Methods	Development of a simplified tool that allows quick assessment of wastewater treatment options based on LCA and LCC data. Tool and case study looked at local water treatment in Australia.	Expansion of tool to be applicable to more regions; incorporationg I/O analysis
Stamford, L., Azapagic, A.	2012	Life cycle sustainability assessment of electricity options for the UK.	International Journal of Energy Research	Journal Article	UK	empirical	full case study	x	x	x	Energy	no	no	Alternative Assessment Methods	Application of a previously developed sustainability assessment method that defined 43 sustainability indicators grouped into four sections for techno-economic, environmental, and social. This method was used to assess possible energy generation technologies for the future energy mix of the UK. According to the assessment there is no clear winner but trade-offs between several technologies have t…	Evaluation of results depending on stakeholder input
Traverso, M., Asdrubali, F., Francia, A., & Finkbeiner, M.	2012	Towards life cycle sustainability assessment: an implementation to photovoltaic modules.	The International Journal of Life Cycle Assessment	Journal Article	Germany	empirical	full case study	x	x	x	Energy	no	no	Case Studies	Case study using LCSA to compare the prodcution of photovoltaic module in Germany and Italy. The results are presented using the Life Cycle Sustainability Dashboard	way of weighting; improvement of data availability
Traverso, M., Finkbeiner, M., Jørgensen, A., & Schneider, L.	2012	Life Cycle Sustainability Dashboard.	Journal of Industrial Ecology	Journal Article	Germany	empirical	full case study	x	x	x	floor coverings	no	no	Case Studies	Introduction of the Dashboard of Sustainability as presentation and communication tool for LCSA	way of weighting
Zamagni, A.	2012	Life cycle sustainability assessment.	The International Journal of Life Cycle Assessment	Editorial	Italy	theoretical	no	x	x	x	-	no	no	Framework	Editorial addressing the developments in the field of sustainability assessment. Publications related to LCA and sustainability are increasing. LCSA is the state-of-the-art of life cycle based sustainability assessment with an alternative approach by Guinee et al. (2011).	How can the LCSA framework be consistently applied, considering also the different degree of maturity of the three methods? Is the consistency requirement (same system boundary) always feasible and conceptually cor-rect or do we need to set other criteria? What do we need to further develop LCSA? What research strategies and lines are considered relevant?
Bachmann, T. M.	2013	Towards life cycle sustainability assessment: drawing on the NEEDS project’s total cost and multi-criteria decision analysis ranking methods.	The International Journal of Life Cycle Assessment	Journal Article	Germany	theoretical	no	x	x	x	-	yes	no	Multi-Criteria Decision Analysis	Comparison of external cost assessment and multi-criteria decision analysis (MCDA) that are part of the New Energy Externalities Development for Sustainability (NEEDS) in order to draw conclusions or LCSA development. They find that both approaches overlap with the exception of several social indicators and arrive at a list of indicators for sustainability assessment derived from both assessment …	Not explicitly mentioned - however, improvement potentials for LCSA are pointed out: "For the development of LCSA, [...] a consequential approach allows assessing pecuniary effects and repercussions of adaptation measures, relevant for a sustainability context, and that developing a life cycle impact assessment for LCC would provide valuable information. The study concludes with raising a few que…
Cinelli, M., Coles, S. R., Jørgensen, A., Zamagni, A., Fernando, C., & Kirwan, K.	2013	Workshop on life cycle sustainability assessment: the state of the art and research needs—November 26, 2012, Copenhagen, Denmark.	The International Journal of Life Cycle Assessment	Journal Article	UK	theoretical	no	x	x	x	-	no	no	Framework	Summary of conference sessions: alternative approaches to LCSA could be 1) LCC + SLCA as additional impact categories for an LCI of an LCA 2) Eco-efficiency + SLCA 3) LCA + socioeconomic analysis (currently in development by the IFEU) Furthermore it was suggested by Joergensen that LCSA could be covered by modified LCA + SLCA to be in line with the sustainability definition by the Brundtland comi…	Communication of LCSA results; How to put LCSA into practice especially in light of the current development state of SLCA
Foolmaun, R., Ramjeawon, T.	2013	Life cycle sustainability assessments (LCSA) of four disposal scenarios for used polyethylene terephthalate (PET) bottles in Mauritius.	Environment; Development and Sustainability	Journal Article	Mauritius	both	full case study	x	x	x	waste management	yes	no	LCSA Components	The paper analyses four different scenarios for recycling of PET bottles using LCA, LCC and SLCA. For LCC they calculated the NPV of the scenario once with and once without external costs. In order to consolidate SLCA results the relative contribution to every dimension was expressed as percentage of the scenario with the highest performance in this dimension. The percentage ranges were then assi…	not mentioned
Foolmaun, R., Ramjeeawon, T.	2013	Comparative life cycle assessment and social life cycle assessment of used polyethylene terephthalate (PET) bottles in Mauritius.	The International Journal of Life Cycle Assessment	Journal Article	Mauritius	both	full case study		x	x	waste management	yes	no	LCSA Components	The paper analyses four different scenarios for recycling of PET bottles using LCA and SLCA. In order to consolidate SLCA results the relative contribution to every dimension was expressed as percentage of the scenario with the highest performance in this dimension. The percentage ranges were then assigned points that were compared in the end.	Also assess the impacts on the economic pillar of sustainability
Hu, M., Kleijn, R., Bozhilova-Kisheva, K. P., & Di Maio, F.	2013	An approach to LCSA: the case of concrete recycling.	The International Journal of Life Cycle Assessment	Journal Article	Netherlands	both	full case study	x	x	x	building	yes	no	LCSA Components	Proposal to structure the goal and scope definition of an LCSA into questions depending on the level of assessment in order to find the appropriate tools for the respective question. Case study of concrete recycling shows the feasibility by distinguishing between the project/process level and the sector level	More case studies
Jørgensen, A., Herrmann, I. T., & Bjørn, A.	2013	Analysis of the link between a definition of sustainability and the life cycle methodologies.	The International Journal of Life Cycle Assessment	Journal Article	Denmark	theoretical	no	x	x	x	-	no	no	Framework	The paper analyses whether the proposed LCSA can actually assess the effects on sustainability as defined in the Brundtland report. They find that LCA and SLCA are necessary (even though further development towards assessment of poverty is needed) but LCC is not necessarily an integral part.	How do product life cycles in general affect in particular poverty and (natural, human, social and produced) capital and what indicators could be used to capture this effect?; Develop a comprehensive theory about the impacts from product life cycles on its surroundings
Kucukvar, M., Tatari, O.	2013	Towards a triple bottom-line sustainability assessment of the US construction industry.	The International Journal of Life Cycle Assessment	Journal Article	USA	both	full case study	x	x	x	building	yes	no	Multi-Regional Input-Output Analysis	Extended multi-regional-input-output analysis (based on supply and use tables by the US Bureau of Economic Analysis) in order to determine the sustainability impacts of the US building sector. Three economic and three social indicators where chosen as well as eight environmental indicators. The study finds the main environmental impacts to be in the supply chain.	More robust environmental/footprint indicators; better disaggregation of construction sector in I/O model; land use by construction sector and type
Luthe, T., Kägi, T., & Reger, J.	2013	A Systems Approach to Sustainable Technical Product Design.	Journal of Industrial Ecology	Journal Article	Switzerland	both	full case study	x	x	x	sport equipment	yes	no	Alternative Assessment Methods	Development of a tool that integrates LCA, S-LCA and economical aspects into product design combined with CAD-software. They drew on the method for sustainable product development (MSPD) by Byggeth. They applied the method to the design process and choice of material composition of skis.	not mentioned
Ostermeyer, Y., Wallbaum, H., & Reuter, F.	2013	Multidimensional Pareto optimization as an approach for site-specific building refurbishment solutions applicable for life cycle sustainability assessment.	The International Journal of Life Cycle Assessment	Journal Article	Sweden	both	full case study	x	x		building	yes	no	Multi-Criteria Decision Analysis	Analysis of different refurbishing options for buildings using LCC and LCA. In order to find the ideal scenario out of >700 the pareto optimal approach is used that advocates trade-off in both dimensions in order to arrive at the overall strongest scenario.	Dynamic integration of energy prices and discount rates (LCC); Dynamic integration of changing energy mixes (LCA); Integration of social dimension (SLCA)
Pesonen, H., Horn, S.	2013	Evaluating the Sustainability SWOT as a streamlined tool for life cycle sustainability assessment.	The International Journal of Life Cycle Assessment	Journal Article	Finland	both	no	x	x	x	-	yes	no	LCSA Components	Evaluation of the SWOT-Matrix introduced by Pesonen (2007) that enables identification of strenghts, weaknesses, opportunities, and threats for sustainabilty as a streamlined LCSA approachthat incorporates all three dimensions in a concise manner that is easily to communicate. A survey of 90 practitioners (33% response rate) found that the SWOT is usable and generated changes.	Examine further how the SWOT has initiated change
Sala, S., Farioli, F., & Zamagni, A.	2013	Life cycle sustainability assessment in the context of sustainability science progress (part 2).	The International Journal of Life Cycle Assessment	Journal Article	Italy	theoretical	no	x	x	x	-	no	no	Framework	Evaluation of LCSA (Klöpffer) and LCSA (Guinee) against the sustainability assessment criteria they derived in the first part of the paper. Both frameworks are considered potentially fit to work as sustainability assessment method, but the framework of Guinee is seen as further along although it still misses translation into operation.	The frameworks should be further developed to, inter alia, guarantee a holistic perspective in the assessment, be hierarchially different from LCA tools, encourage stakeholder involvement, widen the goal of the integrated assessment
Sala, S., Farioli, F., & Zamagni, A.	2013	Progress in sustainability science: lessons learnt from current methodologies for sustainability assessment: Part 1.	The International Journal of Life Cycle Assessment	Journal Article	Italy	theoretical	no	x	x	x	-	no	yes	Framework	Development of a framework in order to structure the field of sustainability science according to the scientific and social paradigm. Identification of key sustainable development principles and definition of terms like framework, tool, method. A meta-review of paper on sustainability assessments in order to check whether they can be integrated in the freshly developed sustainability science fram…	"holistic and system wide approaches, shift from multi- towards trans-disciplinarity; multi-scale (temporal and geographical) perspectives; and better involvement and participation of stakeholders"
Tugnoli, A., Cozzani, V., & Santarelli, F.	2013	Supporting Process Design by a Sustainability KPIs Methodology.	Management Principles of Sustainable Industrial Chemistry	Book Chapter	Italy	theoretical	no	x	x	x	-	yes	no	Alternative Assessment Methods	Method development for indicator selection that enable sustainability assessments of design choices based on expected process impacts as life cycle assessments are impractical at this stage in the product life. A tree of impacts enables structured top-down structuring of indicators. Furthermore, normalization values for exemplary indicators are proposed based on an impact range that was defined f…	not mentioned
Valdivia, S., Ugaya, C. M. L., Hildenbrand, J., Traverso, M., Mazijn, B., & Sonnemann, G.	2013	A UNEP/SETAC approach towards a life cycle sustainability assessment—our contribution to Rio+20.	The International Journal of Life Cycle Assessment	Journal Article	France	empirical	full case study	x	x	x	building	no	no	Case Studies	Demonstration of the current state-of-the-art of LCSA together with a case study of marble.	Impact assessment methodologies, case studies, cutoff rules, definitions and formats of communication and dissemination of LCSA results
Vinyes, E., Oliver-Solà, J., Ugaya, C., Rieradevall, J., & Gasol, C. M.	2013	Application of LCSA to used cooking oil waste management.	The International Journal of Life Cycle Assessment	Journal Article	Spain	both	full case study	x	x	x	waste management	yes	no	LCSA Components	The paper analyses three different scenarios for the collection of used cooking oil by applying LCSA. In order to consolidate results the relative contribution the every dimension was expressed as percentage of the scenario with the highest performance in this dimension. The percentage ranges were then assigned points that were compared in the end.	weighting process and measuring of social impacts (how to make them quantifiable and how to deal with different perceptions)
Wang, X., Chan, H. K.	2013	An integrated fuzzy approach for evaluating remanufacturing alternatives of a product design.	Journal of Remanufacturing	Journal Article	UK	both	full case study	x		x	Automotive	yes	no	Multi-Criteria Decision Analysis	Application of fuzzy TOPSIS to evaluate several design alternatives in respect to remanufacturing. They broke the remanufacturing process down into 6 main steps, the main criteria for each step, and fixed four performance measures (value, cost, health & safety, design difficulties) for which via TOPSIS the distance to the ideal scenario has been determined.They tested the method on a case study o…	Try more objective methods like data envelopment analysis; working on capturing the dynamic relations between evaluation criteria with maybe the use of DEMATEL or ANP
Zamagni, A., Pesonen, H.-L., & Swarr, T.	2013	From LCA to Life Cycle Sustainability Assessment: concept, practice and future directions.	The International Journal of Life Cycle Assessment	Editorial	Italy	theoretical	no	x	x	x	-	no	no	Framework	The special issue tried to answer the question whether the methods and tools developed so far are able to address sustainability questions in business and policy context. The answers were grouped into three perspectives, i.e. concepts, practice, and future directions. In the field of concepts, the operationalisation issue of SLCA is addressed, the framework approaches to LCSA ("assessment" and "a…	"LCSA, as noted in the contributions, will need to expand its goal beyond targeting hotspots and minimizing negative impacts to developing positive solutions and encouraging social learning and adaptation"
Hoogmartens, R., Van Passel, S., Van Acker, K., & Dubois, M.	2014	Bridging the gap between LCA, LCC and CBA as sustainability assessment tools.	Environmental Impact Assessment Review	Journal Article	Belgium	both	full case study	x	x		Automotive	no	no	Framework	Comparison and discussion of LCA/LCC (+ SLCA) and CBA for assessment of sustainability resulting in an illustrative framework to show differences and interactions. Environmental LCC is regarded as "pure LCC", full environmental LCC is LCC with monetization of environmental impacts. LCA tools use steady-state models (i.e. no discounting), whereas CBA uses discounting. The case study shows that dis…	not mentioned
Ingwersen, W., Cabezas, H., Weisbrod, A., Eason, T., Demeke, B., Ma, X., Ceja, M.	2014	Integrated Metrics for Improving the Life Cycle Approach to Assessing Product System Sustainability.	Sustainability	Journal Article	USA	theoretical	no	x	x	x	-	yes	no	Alternative Assessment Methods	Proposal to include integrated metrics into sustainability analyses as they provide an important aspect, i.e. the relation of sustainability impacts to the limited system they take place in. Four specific integrated metrics are proposed to capture these additional information, namely Ecological footprint (addressing land use and carbon emission effects), Green Net Value Added (addressing total co…	Refining use of integrated metrics for assessment of product systems; case studies; providing capacity for spatially- and time-related information to be integrated into current LC(S)A systems; better determination of uncertainty embodied in integrated metrics
Klöpffer, W., Grahl, B.	2014	From LCA to Sustainability Assessment.	Life Cycle Assessment (LCA)	Book Chapter	Germany	theoretical	no	x	x	x	-	no	no	Framework	Gives an overview of the state-of-the-art of LCSA by looking at the current status of LCA, LCC, and SLCA. Regarding LCA it is still the only internationally standardized method. The method could be expanded by including additional indicators that extent beyond the currently mostly used CML2001 method, such as noise, waste heat, impact on ecosystem. LCC is not yet standardized and also has no clea…	not mentioned
Kucukvar, M., Noori, M., Egilmez, G., & Tatari, O.	2014	Stochastic decision modeling for sustainable pavement designs.	The International Journal of Life Cycle Assessment	Journal Article	USA	both	full case study	x	x	x	building	yes	no	Multi-Regional Input-Output Analysis	Application of I/O-analysis based on US supply and use tables to a "TBL-LCA" of different asphalt types (method from Kucukvar 2013). 10 environmental indicators (mainly from Ecological Footprint) and 6 socio-economic indicators were chosen. A multi-criteria decision model (compromise programming) was used to determine the ideal mix of asphalt alternatives for given weigths to the environmental or…	Evaluate other WMA technologies such as Synthetic Zeolite and WAM-Foam
Lu, B., Li, B., Wang, L., Yang, J., Liu, J., & Wang, X. V.	2014	Reusability based on Life Cycle Sustainability Assessment: Case Study on WEEE.	Procedia CIRP	Journal Article	China	empirical	full case study	x	x	x	Electronics	no	no	Case Studies	Application of LCSA to assess two recycling routes (material recovery or component reuse) of mobile phones in the formal and informal recycling sector in China. It shows that component reuse is economically and environmentally preferable. However, no clear statement could be made regarding social impacts as it could not be decided whether job creation or health and safety have priority.	Better integration of all three dimensions
Martínez-Blanco, J., Lehmann, A., Muñoz, P., Antón, A., Traverso, M., Rieradevall, J., & Finkbeiner, M.	2014	Application challenges for the social Life Cycle Assessment of fertilizers within life cycle sustainability assessment.	Journal of Cleaner Production	Journal Article	Germany	empirical	full case study	x	x	x	Chemical Products (fertilizers)	no	no	Case Studies	Case study using LCSA framework with special focus on SLCA that is conducted according to UNEP guidelines. 2 mineral and one compost fertilizer are compared with LCA (CML 2001), LCC (consumer perspective, i.e. fertilizer prices), and SLCA (SHDB) while using worked hours for allocating impacts to the product. Because of the uncertainty of SLCA results (especially regarding data availability as wel…	Further case studies; more experience and guidance on how to deal with inconsistencies/differences in system boundaries of the different tools; improvement of data availability for SLCA
Mjörnell, K., Boss, A., Lindahl, M., & Molnar, S.	2014	A Tool to Evaluate Different Renovation Alternatives with Regard to Sustainability.	Sustainability	Journal Article	Sweden	theoretical	no	x	x	x	building	yes	no	Alternative Assessment Methods	Development of an evaluation method for renovation alternatives based on the three dimensions of sustainability and derivation of a set of indicators for each dimension from LCA/LCC/SLCA. Even though SLCA is the tool of choice for the assessment of the social sphere, they derived their indicators for the social assessment from the S2020 Knowledge Matrix.	Testing of the entire decision support tool, in particular the social assessment which has not yet been tested
Onat, N. C., Kucukvar, M., & Tatari, O.	2014	Integrating triple bottom line input–output analysis into life cycle sustainability assessment framework: the case for US buildings.	The International Journal of Life Cycle Assessment	Journal Article	USA	both	full case study	x	x	x	building	yes	no	Multi-Regional Input-Output Analysis	Application of I/O-analysis based on US supply and use tables to an LCSA of residental and commercial buildings in the US. 16 indicators were chosen to assess the TBL effects (3 economic, 3 social (rather socio-economic), 4 environmental, 6 ecological, i.e. ecological footprint). Results show residential buildings to have higher impacts in all categories.	Development of multi-regional I/O tables; development of dynamic models
Onat, N., Kucukvar, M., & Tatari, O.	2014	Towards Life Cycle Sustainability Assessment of Alternative Passenger Vehicles.	Sustainability	Journal Article	USA	empirical	full case study	x	x	x	Automotive	no	no	Multi-Regional Input-Output Analysis	Application from method by Kucukvar (2013), i.e. combination of I/O analysis based on US supply and use tables with TBL-LCA, to different automobile types (internal combustion, hybrid, electric). According to the analysis, the manufacturing phase is most significant for the socio-economic performance, whereas the use-phase is the major contributor to environmental impacts.	Improvement of multi-regional I/O models (better granularity and extendability with socio-economic indicators)
Shuaib, M., Seevers, D., Zhang, X., Badurdeen, F., Rouch, K. E., & Jawahir, I. S.	2014	Product Sustainability Index (ProdSI).	Journal of Industrial Ecology	Journal Article	USA	both	numerical example	x	x	x	Electronics	yes	no	Alternative Assessment Methods	Development of a new product sustainability assessment method: the Product Sustainability Index as they claim current PSA methods do not cover all three dimensions and especially the 6Rs (reduce, reuse, recycle, recover, redesign, remanufacture), even though they do not reference LCSA. They define 3 clusters (environmental, economic, and social) with respective underclusters until reaching the in…	not mentioned
Stamford, L., Azapagic, A.	2014	Life cycle sustainability assessment of UK electricity scenarios to 2070.	Energy for Sustainable Development	Journal Article	UK	both	full case study	x	x	x	Energy	yes	no	Alternative Assessment Methods	Sustainability assessment of different electricity mixes. Even though it is called LCSA they rather compiled a list of 16 indicators from different sources and own deliberations than adhering to the LCSA framework (environmental indicators are in line with LCA but social and economic indicators are not derived from SLCA and LCC respectively). The results for the different scenarios are compared u…	Reduce uncertainty in impacts that arise due to current technological limitations of matching electrical supply and demand
Stefanova, M., Tripepi, C., Zamagni, A., & Masoni, P.	2014	Goal and Scope in Life Cycle Sustainability Analysis: The Case of Hydrogen Production from Biomass.	Sustainability	Journal Article	Italy	both	numerical example	x	x	x	Automotive	yes	no	LCSA Components	Further structuring of the goal & scope phase of LCSA in order to better link it to the modelling phase. Goal and scope phase should therefore consist of definition of macro-goals, a technology map, and a respective context. The technology map comprises all possible technological routes for a product. Depending on the context of the study, a certain or few certain routes are identified and chosen…	Further detail contexts of regions in order to effectively make use of technology matrix
Torquati, B., Venanzi, S., Ciani, A., Diotallevi, F., & Tamburi, V.	2014	Environmental Sustainability and Economic Benefits of Dairy Farm Biogas Energy Production: A Case Study in Umbria.	Sustainability	Journal Article	Italy	both	full case study	x	x		Agriculture	yes	no	Alternative Assessment Methods	Case study evaluating a biomass energy production that is fed with energy crops and dairy farm wastes. Environmental impacts were addressed using LCA, economic impacts were determined by accounting for the costs and revenues of the operator of the plant and farm. Main source for environmental impacts is the cultivation of energy crops. The plant is profitable for the operator which depends mainly…	not mentioned
Buchert, T., Neugebauer, S., Schenker, S., Lindow, K., & Stark, R.	2015	Multi-criteria Decision Making as a Tool for Sustainable Product Development – Benefits and Obstacles.	Procedia CIRP	Journal Article	Germany	both	full case study	x	x		Manufacturing	yes	no	Multi-Criteria Decision Analysis	Development of a method that aims at integrating sustainability aspects early in the design process by integrating LCSA, engineering design processes, and multi-criteria assessment. The combination results in a decision-tree that depicts several design solutions and their impacts which is then analysed using multi-criteria assessment in order to determine the preferable option. The method is test…	Integration of social dimension; how could the decision tree be integrated with other system models
Dewulf, J., Mancini, L., Blengini, G. A., Sala, S., Latunussa, C., & Pennington, D.	2015	Toward an Overall Analytical Framework for the Integrated Sustainability Assessment of the Production and Supply of Raw Materials and Primary Energy Carriers.	Journal of Industrial Ecology	Journal Article	Italy	theoretical	no	x	x	x	-	yes	no	Alternative Assessment Methods	Development of a new method to assess the sustainability of raw materials and primary energy carriers - called integrated sustainability assessment framework (ISAF). They introduce an additional pillar to the assessment: the technical dimension and propose a total of 15 indicators for assessing their four dimensions of sustainability. Environmental and social indicators are mainly derived from LC…	Case study with some of the identified raw materials; including expertise, associated models, software, and data
Hirschberg, S., Burgherr, P.	2015	Sustainability Assessment for Energy Technologies.	Handbook of Clean Energy Systems	Book Chapter	Switzerland	both	full case study	x	x	x	Energy	yes	no	Alternative Assessment Methods	Sustainability assessment of different energy technologies using the assessment framework which was also used in NEEDS and Axpo. Environmental assessment was done using LCA and Ecoinvent database, social impacts pertained to health and safety evaluation by experts, and economic assessment took capital investment and fuel prices into account. Aggregation of the three dimensions was done by (1) ext…	not mentioned
Keller, H., Rettenmaier, N., & Reinhardt, G. A.	2015	Integrated life cycle sustainability assessment – A practical approach applied to biorefineries.	Applied Energy	Journal Article	Germany	both	full case study	x	x	x	Fuels	yes	yes	Framework	Develpment of an extension to the LCSA framework in order to include the assessment of several scenarios and compare them in regards to future implementation and possible barriers. The framework is demonstrated by showing results of the assessment of several biofuel production routes that were done for an EC project. Even though it is based on LCSA, the Social dimension is limited to a few qualit…	SLCA; LCC; presentation/communication format
Li, H., Nitivattananon, V., & Li, P.	2015	Developing a Sustainability Assessment Model to Analyze China’s Municipal Solid Waste Management Enhancement Strategy.	Sustainability	Journal Article	Thailand	both	full case study	x	x	x	waste management	yes	no	Alternative Assessment Methods	Development of a sustainability assessment model (SAM) as a combination of LCA, FCA, health risk assessment, and AHP. Environmental indicators were derived from the Environmental Design of Industrial Products (EDIP) process. Social impacts were determined using the health risk assessment by the US EPA. Economic impacts were calculated using simplified FCA, i.e. capital cost + operation and mainte…	not mentioned
Minne, E., Crittenden, J. C.	2015	Impact of maintenance on life cycle impact and cost assessment for residential flooring options.	The International Journal of Life Cycle Assessment	Journal Article	USA	empirical	full case study	x	x		building	no	no	Case Studies	Application of LCA (SimaPro + EcoInvent) as well as LCC (customer perspective) to flooring options in order to determine what influence maintenance has over the lifetime. High to no maintenance scenarios were considered and uncertainty analysis was conducted. Results were normalized to the average of the options that were examined. A final score was calculated with different weighting for environ…	Get better data on average cleaning procedures and more information on the contents of cleaning agents
Neugebauer, S., Martinez-Blanco, J., Scheumann, R., & Finkbeiner, M.	2015	Enhancing the practical implementation of life cycle sustainability assessment – proposal of a Tiered approach.	Journal of Cleaner Production	Journal Article	Germany	theoretical	no	x	x	x	-	yes	yes	Framework	Proposition of a tiered approach to LCSA and a suggestion for midpoint indicators for the respective tier. 3 tiers are proposed: sustainability footprint (basic approach for easy access to method), best practice (broader approach that reflects the prevalent best practice), comprehensive (even broader approach that also includes non-operationalised indicators).	Testing of the tiered model; Amendment/expansion of current indicator lists; definition of fourth tier for endpoint indicators
Ren, J., Manzardo, A., Mazzi, A., Zuliani, F., & Scipioni, A.	2015	Prioritization of bioethanol production pathways in China based on life cycle sustainability assessment and multicriteria decision-making.	The International Journal of Life Cycle Assessment	Journal Article	Italy	both	full case study	x	x	x	Chemicals (Fuel)	yes	no	Multi-Criteria Decision Analysis	Combination of LCSA for sustainability assessment and multi-criteria assessment methods (AHP and VIKOR) for weighting and ranking the results in order to determine what the most preferable source for bioethanol is regarding sustainability impacts. Social indicators are translated into quantifiable metrics via fuzzy set theory applied to qualitative stakeholder evaluations of social performances. …	Compare with results of the same case study using singular sustainability indicators like ecological footprint or energy index of sustainability
Souza, R. G., Rosenhead, J., Salhofer, S. P., Valle, R. A. B., & Lins, M. P. E.	2015	Definition of sustainability impact categories based on stakeholder perspectives.	Journal of Cleaner Production	Journal Article	Brazil	both	full case study	x	x	x	Recycling	yes	no	LCSA Components	Method to define impact categories and impact pathways for the social and economic dimension of LCSA by stakeholder engagement. They derived causal maps from the subjective feedback of stakeholders regarding their assessment of the important points/categories in the Brazilian WEEE sector. The result yielded familiar impact categories but also new ones, especially for social: digital inclusion was…	Compare results of impact categories with other LCSA studies of a similar context; test in different context
Traverso, M., Kim, P., Brattig, S., & Wagner, V.	2015	Managing Life Cycle Sustainability Aspects in the Automotive Industry.	Life Cycle Management	Book Chapter	Germany	theoretical	no	x	x	x	Automotive	no	no	Framework	Book chapter that describes the current state of implementation of life cycle assessment tools at BMW. While LCA is fully integrated, SLCA is currently being integrated by engagement in the Roundtable for Product Social Metrics, and LCC is yet to be addressed.	not mentioned
Yu, M., Halog, A.	2015	Solar Photovoltaic Development in Australia—A Life Cycle Sustainability Assessment Study.	Sustainability	Journal Article	Austria	empirical	full case study	x	x	x	Energy	no	no	Case Studies	Application of LCSA to a PV array in Australia. The method straightforward follows the ISO structure for LCA and the derived structure for LCC and SLCA. LCA is calculated using SimaPro, also looking at the energy payback period. LCC is calculated using System Advisor Model (SAM) focusing on rentability for the plant owner. SLCA is conducted after the UNEP/SETAC guidelines but rather basic in a qu…	More case studies, especially to further detail social performance; investigate more complex systems and take dynamic interrelationships into perspective

## Sheet: Initial hits
No.	Author	Year	Title	Source	Platform	Excluded based on title	Excluded based on abstract	Excluded based on full-text	Included in review
1	Alessandra Zamagni	2012	Life cycle sustainability assessment	The International Journal of Life Cycle Assessment	SpringerLink				x
2	Marco Cinelli, Stuart R. Coles, Andreas Jørgensen, Alessandra Zamagni, Chalaka Fernando, Kerry Kirwan	2013	Workshop on life cycle sustainability assessment: the state of the art and research needs, November 26, 2012, Copenhagen, Denmark	The International Journal of Life Cycle Assessment	SpringerLink				x
3	Alessandra Zamagni, Hanna-Leena Pesonen, Thomas Swarr	2013	From LCA to Life Cycle Sustainability Assessment: concept, practice and future directions	The International Journal of Life Cycle Assessment	SpringerLink				x
4	Marzia Traverso, Francesco Asdrubali, Annalisa Francia, Matthias Finkbeiner	2012	Towards life cycle sustainability assessment: an implementation to photovoltaic modules	The International Journal of Life Cycle Assessment	SpringerLink				x
5	Bernard Mazijn, Jean-Pierre Revéret	2015	Life Cycle Sustainability Assessment: A Tool for Exercising Due Diligence in Life Cycle Management	Life Cycle Management	SpringerLink			x
6	Hanna-Leena Pesonen, Susanna Horn	2013	Evaluating the Sustainability SWOT as a streamlined tool for life cycle sustainability assessment	The International Journal of Life Cycle Assessment	SpringerLink				x
7	Till M. Bachmann	2013	Towards life cycle sustainability assessment: drawing on the NEEDS project's total cost and multi-criteria decision analysis ranking methods	The International Journal of Life Cycle Assessment	SpringerLink				x
8	Jingzheng Ren, Alessandro Manzardo, Anna Mazzi, Filippo Zuliani, Antonio Scipioni	2015	Prioritization of bioethanol production pathways in China based on life cycle sustainability assessment and multicriteria decision-making	The International Journal of Life Cycle Assessment	SpringerLink				x
9	Sonia Valdivia, Cassia M. L. Ugaya, Jutta Hildenbrand, Marzia Traverso, Bernard Mazijn, Guido Sonnemann	2013	A UNEP/SETAC approach towards a life cycle sustainability assessment - our contribution to Rio+20	The International Journal of Life Cycle Assessment	SpringerLink				x
10	Richard Wood, Edgar G. Hertwich	2013	Economic modelling and indicators in life cycle sustainability assessment	The International Journal of Life Cycle Assessment	SpringerLink			x
11	Stefania Pizzirani, Sarah J. McLaren, Jeffrey K. Seadon	2014	Is there a place for culture in life cycle sustainability assessment?	The International Journal of Life Cycle Assessment	SpringerLink			x
12	York Ostermeyer, Holger Wallbaum, Friedrich Reuter	2013	Multidimensional Pareto optimization as an approach for site-specific building refurbishment solutions applicable for life cycle sustainability assessment	The International Journal of Life Cycle Assessment	SpringerLink				x
13	Nuri Cihat Onat, Murat Kucukvar, Omer Tatari	2014	Integrating triple bottom line input - output analysis into life cycle sustainability assessment framework: the case for US buildings	The International Journal of Life Cycle Assessment	SpringerLink				x
14	Walter Kloepffer	2008	Life cycle sustainability assessment of products	The International Journal of Life Cycle Assessment	SpringerLink				x
15	Serenella Sala, Francesca Farioli, Alessandra Zamagni	2013	Life cycle sustainability assessment in the context of sustainability science progress (part 2)	The International Journal of Life Cycle Assessment	SpringerLink				x
16	Rajendra Kumar Foolmaun, Toolseeram Ramjeawon	2013	Life cycle sustainability assessments (LCSA) of four disposal scenarios for used polyethylene terephthalate (PET) bottles in Mauritius	Environment, Development and Sustainability	SpringerLink				x
17	Erwin M Schau, Marzia Traverso, Matthias Finkbeiner	2012	Life cycle approach to sustainability assessment: a case study of remanufactured alternators	Journal of Remanufacturing	SpringerLink				x
18	Marzia Traverso, Patrick Kim, Stefan Brattig, Volkmar Wagner	2015	Managing Life Cycle Sustainability Aspects in the Automotive Industry	Life Cycle Management	SpringerLink				x
19	Sonia Valdivia, Sanjeevan Bajaj, Guido Sonnemann, Ana Quiros, Cassia Maria Lie Ugaya	2015	Mainstreaming Life Cycle Sustainability Management in Rapidly Growing and Emerging Economies Through Capacity-Building	Life Cycle Management	SpringerLink		x
20	Reinout Heijungs, Ettore Settanni, Jeroen Guinée	2013	Toward a computational structure for life cycle sustainability analysis: unifying LCA and LCC	The International Journal of Life Cycle Assessment	SpringerLink		x
21	Annekatrin Lehmann, Eva Zschieschang, Marzia Traverso, Matthias Finkbeiner, Liselotte Schebek	2013	Social aspects for sustainability assessment of technologies - challenges for social life cycle assessment (SLCA)	The International Journal of Life Cycle Assessment	SpringerLink	x
22	Serenella Sala, Francesca Farioli, Alessandra Zamagni	2013	Progress in sustainability science: lessons learnt from current methodologies for sustainability assessment: Part 1	The International Journal of Life Cycle Assessment	SpringerLink				x
23	Murat Kucukvar, Omer Tatari	2013	Towards a triple bottom-line sustainability assessment of the U.S. construction industry	The International Journal of Life Cycle Assessment	SpringerLink				x
24	Guido Sonnemann, Eskinder Demisse Gemechu, Arne Remmen, Jeppe Frydendal, Allan Astrup Jensen	2015	Life Cycle Management: Implementing Sustainability in Business Practice	Life Cycle Management	SpringerLink			x
25	Eskinder Demisse Gemechu, Guido Sonnemann, Arne Remmen, Jeppe Frydendal, Allan Astrup Jensen	2015	How to Implement Life Cycle Management in Business?	Life Cycle Management	SpringerLink		x
26	Julie Parent, Carmela Cucuzzella, Jean-Pierre Revéret	2013	Revisiting the role of LCA and SLCA in the transition towards sustainable production and consumption	The International Journal of Life Cycle Assessment	SpringerLink		x
27	Andreas Jørgensen, Ivan T. Herrmann, Anders Bjørn	2013	Analysis of the link between a definition of sustainability and the life cycle methodologies	The International Journal of Life Cycle Assessment	SpringerLink				x
28	Gerald Rebitzer	2015	Introduction: Life Cycle Management	Life Cycle Management	SpringerLink		x
29	Murat Kucukva, rMehdi Noori, Gokhan Egilmez, Omer Tatari	2014	Stochastic decision modeling for sustainable pavement designs	The International Journal of Life Cycle Assessment	SpringerLink				x
30	Mingming Hu, René Kleijn, Kossara P. Bozhilova-Kisheva, Francesco Di Maio	2013	An approach to LCSA: the case of concrete recycling	The International Journal of Life Cycle Assessment	SpringerLink				x
31	Haibin Chen, Yu Yang, Yan Yang, Wei Jiang, Jingcheng Zhou	2014	A bibliometric investigation of life cycle assessment research in the web of science databases	The International Journal of Life Cycle Assessment	SpringerLink			x
32	Laura Schneider, Markus Berger, Eckhard Schüler-Hainsch, Sven Knöfel, Klaus Ruhland, Jörg Mosig, Vanessa Bach, Matthias Finkbeiner	2014	The economic resource scarcity potential (ESP) for evaluating resource use based on life cycle assessment	The International Journal of Life Cycle Assessment	SpringerLink	x
33	Archana Datta, Sonia Valdivia	2014	Indian Conference on Life Cycle Management 2014	The International Journal of Life Cycle Assessment	SpringerLink		x
34	Rajendra Kumar Foolmaun, Toolseeram Ramjeeawon	2013	Comparative life cycle assessment and social life cycle assessment of used polyethylene terephthalate (PET) bottles in Mauritius	The International Journal of Life Cycle Assessment	SpringerLink				x
35	Eskinder D. Gemechu, Guido Sonnemann, Steven B. Young	2015	Geopolitical-related supply risk assessment as a complement to environmental impact assessment: the case of electric vehicles	The International Journal of Life Cycle Assessment	SpringerLink			x
36	Michael Z. Hauschild	2014	Life cycle assessment handbook - a guide for environmentally sustainable products by Mary Ann Curran (ed)	The International Journal of Life Cycle Assessment	SpringerLink	x
37	Elisabet Vinyes, Jordi Oliver-Solá, Cassia Ugaya, Joan Rieradevall, Carles M. Gasol	2013	Application of LCSA to used cooking oil waste management	The International Journal of Life Cycle Assessment	SpringerLink				x
38	Cornelis Theunis Van Der Lugt	2015	Taking Life Cycle Management Mainstream: Integration in Corporate Finance and Accounting	Life Cycle Management	SpringerLink		x
39	Thomas E. Swarr, David Hunkeler, Walter Klöpffer, Hanna-Leena Pesonen, Andreas Ciroth, Alan C. Brent, Robert Pagan	2011	Environmental life-cycle costing: a code of practice	The International Journal of Life Cycle Assessment	SpringerLink	x
40	Walter Klöpffer	2012	Thank you Almut!	The International Journal of Life Cycle Assessment	SpringerLink	x
41	Hayo M. G. van der Werf, Michael S. Corson, Aurélie Wilfart	2013	LCA Food 2012 - towards sustainable food systems	The International Journal of Life Cycle Assessment	SpringerLink	x
42	Matthias Finkbeiner	2013	From the 40s to the 70s - the future of LCA in the ISO 14000 family	The International Journal of Life Cycle Assessment	SpringerLink	x
43	Lucia Mancini, Serenella Sala, Marco Recchioni, Lorenzo Benini, Malgorzata Goralczyk, David Pennington	2015	Potential of life cycle assessment for supporting the management of critical raw materials	The International Journal of Life Cycle Assessment	SpringerLink		x
44	Carl Vadenbo, Jakob Rørbech, Melanie Haupt, Rolf Frischknecht	2014	Abiotic resources: new impact assessment approaches in view of resource efficiency and resource criticality, 55th Discussion Forum on Life Cycle Assessment, Zurich, Switzerland, April 11, 2014	The International Journal of Life Cycle Assessment	SpringerLink	x
45	Rosana Adami Mattioda, Anna Mazzi, Osíris Canciglieri Jr., Antonio Scipioni	2015	Determining the principal references of the social life cycle assessment of products	The International Journal of Life Cycle Assessment	SpringerLink	x
46	Mark Barthel, James A. Fava, Curtis A. Harnanan, Philip Strothmann, Sofia Khan, Simon Miller	2015	Hotspots Analysis: Providing the Focus for Action	Life Cycle Management	SpringerLink	x
47	Keisuke Nansai, Yuki Kudoh, Hiroki Hondo, Kiyotada Hayashi, Kazuyo Matsubae, Kenichi Nakajima, Shinsuke Murakami, Masaharu Motoshita, Seiji Hashimoto, Minako Hara, Michiyasu Nakajima, Rokuta Inaba, Yasunari Matsuno, Yoshikazu Shinohara	2011	9th International Conference on EcoBalance (9th ICEB), towards and beyond 2020, November 12, 2010, Tokyo, Japan	The International Journal of Life Cycle Assessment	SpringerLink	x
48	Anders Bjørn, Mikołaj Owsianiak, Alexis Laurent, Christine Molin, Torbjørn Bochsen Westh, Michael Zwicky Hauschild	2013	Mapping and characterization of LCA networks	The International Journal of Life Cycle Assessment	SpringerLink	x
49	Walter Klöpffer	2009	Experiences with the critical review process of aluminium LCI data	The International Journal of Life Cycle Assessment	SpringerLink	x
50	Elizabeth Minne, John C. Crittenden	2015	Impact of maintenance on life cycle impact and cost assessment for residential flooring options	The International Journal of Life Cycle Assessment	SpringerLink				x
51	Julie Smith, David Barling	2014	Social impacts and life cycle assessment: proposals for methodological development for SMEs in the European food and drink sector	The International Journal of Life Cycle Assessment	SpringerLink		x
52	Rickard Arvidsson, Henrikke Baumann, Jutta Hildenbrand	2015	On the scientific justification of the use of working hours, child labour and property rights in social life cycle assessment: three topical reviews	The International Journal of Life Cycle Assessment	SpringerLink	x
53	Jozeti Barbutti Gatti, Guilherme de Castilho Queiroz, Eloísa Elena Corrêa Garcia	2008	Recycling of aluminum can in terms of Life Cycle Inventory (LCI)	The International Journal of Life Cycle Assessment	SpringerLink	x
54	Anders Bjørn, Michael Zwicky Hauschild	2015	Introducing carrying capacity-based normalisation in LCA: framework and development of references at midpoint level	The International Journal of Life Cycle Assessment	SpringerLink	x
55	Eléonore Loiseau, Philippe Roux, Guillaume Junqua, Pierre Maurel, Véronique Bellon-Maurel	2013	Adapting the LCA framework to environmental assessment in land planning	The International Journal of Life Cycle Assessment	SpringerLink	x
56	Walter Klöpffer, Mary Ann Curran, Paul Roos	2013	Two captains on the bridge	The International Journal of Life Cycle Assessment	SpringerLink	x
57	Alejandro Pablo Arena, Claudia Peña, Bárbara María Civit	2012	International conference on LCA: CILCA 2013, Mendoza, Argentina, March 24 to 27, 2013	The International Journal of Life Cycle Assessment	SpringerLink	x
58	Qian Hou, Guozhu MaoLin Zhao, Huibin Du, Jian Zuo	2015	Mapping the scientific research on life cycle assessment: a bibliometric analysis	The International Journal of Life Cycle Assessment	SpringerLink			x
59	Alessandra Zamagni, Oscar Amerighi, Patrizia Buttol	2011	Strengths or bias in social LCA?	The International Journal of Life Cycle Assessment	SpringerLink	x
60	Catherine Benoît Norris	2014	Data for social LCA	The International Journal of Life Cycle Assessment	SpringerLink	x
61	Anna Lewandowska, Przemyslaw Kurczewski, Joanna Kulczycka, Katarzyna Joachimiak, Alina Matuszak-Flejszman, Henrikke Baumann, Andreas Ciroth	2013	LCA as an element in environmental management systems: comparison of conditions in selected organisations in Poland, Sweden and Germany	The International Journal of Life Cycle Assessment	SpringerLink	x
62	Ya Hong Dong, S. Thomas Ng	2014	Comparing the midpoint and endpoint approaches based on ReCiPe - a study of commercial buildings in Hong Kong	The International Journal of Life Cycle Assessment	SpringerLink	x
63	Claudia Reitinger, Matthias Dumke, Mario Barosevcic, Rafaela Hillerbrand	2011	A conceptual framework for impact assessment within SLCA	The International Journal of Life Cycle Assessment	SpringerLink	x
64	Laura Schneider, Markus Berger, Matthias Finkbeiner	2011	The anthropogenic stock extended abiotic depletion potential (AADP) as a new parameterisation to model the depletion of abiotic resources	The International Journal of Life Cycle Assessment	SpringerLink	x
65	Xiaojun Wang, Hing Kai Chan	2013	An integrated fuzzy approach for evaluating remanufacturing alternatives of a product design	Journal of Remanufacturing	SpringerLink				x
66	Guangli Du, Mohammed Safi, Lars Pettersson, Raid Karoumi	2014	Life cycle assessment as a decision support tool for bridge procurement: environmental impact comparison among five bridge designs	The International Journal of Life Cycle Assessment	SpringerLink	x
67	Juliette Langlois, Pierre Fréon, Jean-Philippe Steyer, Jean-Philippe Delgenès, Arnaud Hélias	2015	Sea use impact category in life cycle assessment: characterization factors for life support functions	The International Journal of Life Cycle Assessment	SpringerLink	x
68	Tanja Myllyviita, Pekka Leskinen, Jyri Seppälä	2014	Impact of normalisation, elicitation technique and background information on panel weighting results in life cycle assessment	The International Journal of Life Cycle Assessment	SpringerLink	x
69	Loredana Napolano, Costantino Menna, Domenico Asprone, Andrea Prota, Gaetano Manfredi	2015	Life cycle environmental impact of different replacement options for a typical old flat roof	The International Journal of Life Cycle Assessment	SpringerLink	x
70	You Zhang, Xin Liu, Rufeng Xiao, Zengwei Yuan	2015	Life cycle assessment of cotton T-shirts in China	The International Journal of Life Cycle Assessment	SpringerLink	x
71	Thomas E. Swarr	2009	Societal life cycle assessment - could you repeat the question?	The International Journal of Life Cycle Assessment	SpringerLink	x
72	Reinout Heijungs, Arjan de Koning, Jeroen B. Guinée	2014	Maximizing affluence within the planetary boundaries	The International Journal of Life Cycle Assessment	SpringerLink	x
73	Almudena Hospido, Montserrat Núñez, Assumpció Antón	2013	Irrigation mix: how to include water sources when assessing freshwater consumption impacts associated to crops	The International Journal of Life Cycle Assessment	SpringerLink	x
74	Montserrat Núñez, Stephan Pfister, Mar Vargas, Assumpció Antón	2015	Spatial and temporal specific characterisation factors for water use impact assessment in Spain	The International Journal of Life Cycle Assessment	SpringerLink	x
75	Anne-Marie Boulay, Jane Bare, Camillo De Camillis, Petra Döll, Francis Gassert, Dieter Gerten, Sebastien Humbert, Atsushi Inaba, Norihiro Itsubo, Yann Lemoine, Manuele Margni, Masaharu Motoshita, Montse Núñez, Amandine V. Pastor, Brad Ridoutt, Urs Schencker	2015	Consensus building on the development of a stress-based indicator for LCA-based impact assessment of water consumption: outcome of the expert workshops	The International Journal of Life Cycle Assessment	SpringerLink	x
76	Laura Schneider, Markus Berger, Matthias Finkbeiner	2015	Abiotic resource depletion in LCA - background and update of the anthropogenic stock extended abiotic depletion potential (AADP) model	The International Journal of Life Cycle Assessment	SpringerLink	x
77	Andrea L. Hicks, Thomas L. Theis	2014	An agent based approach to the potential for rebound resulting from evolution of residential lighting technologies	The International Journal of Life Cycle Assessment	SpringerLink	x
78	Heiko Keller, Nils Rettenmaier, Guido Andreas Reinhardt	2015	Integrated life cycle sustainability assessment – A practical approach applied to biorefineries	Applied Energy	ScienceDirect				x
79	Sabrina Neugebauer, Julia Martinez-Blanco, René Scheumann, Matthias Finkbeiner	2015	Enhancing the practical implementation of life cycle sustainability assessment – proposal of a Tiered approach	Journal of Cleaner Production	ScienceDirect				x
80	Bin Lu, Bo Li, Lihui Wang, Jianxin Yang, Jingru Liu, Xi Vincent Wang	2014	Reusability based on Life Cycle Sustainability Assessment: Case Study on WEEE	Procedia CIRP	ScienceDirect				x
81	Ronald Orth, René Scheumann, Mila Galeitzke, Kirana Wolf, Holger Kohl, Matthias Finkbeiner	2015	Sustainable Corporate Development Measured by Intangible and Tangible Resources as Well as Targeted by Safeguard Subjects	Procedia CIRP	ScienceDirect	x
82	Tom Buchert, Sabrina Neugebauer, Sebastian Schenker, Kai Lindow, Rainer Stark	2015	Multi-criteria Decision Making as a Tool for Sustainable Product Development – Benefits and Obstacles	Procedia CIRP	ScienceDirect				x
83	Bernd Peukert, Stephan Benecke, Janire Clavell, Sabrina Neugebauer, Nils F. Nissen, Eckart Uhlmann, Klaus-Dieter Lang, Matthias Finkbeiner	2015	Addressing Sustainability and Flexibility in Manufacturing Via Smart Modular Machine Tool Frames to Support Sustainable Value Creation	Procedia CIRP	ScienceDirect	x
84	Guido Sonnemann, Eskinder Demisse Gemechu, Naeem Adibi, Vincent De Bruille, Cécile Bulle	2015	From a critical review to a conceptual framework for integrating the criticality of resources into Life Cycle Sustainability Assessment	Journal of Cleaner Production	ScienceDirect		x
85	R.G. Souza, J. Rosenhead, S.P. Salhofer, R.A.B. Valle, M.P.E. Lins	2014	Definition of sustainability impact categories based on stakeholder perspectives	Journal of Cleaner Production	ScienceDirect				x
86	IJM de Boer, C Cederberg, S Eady, S Gollnow, T Kristensen, M Macleod, M Meul, T Nemecek, LT Phong, G Thoma, HMG van der Werf, AG Williams, MA Zonderland-Thomassen	2011	Greenhouse gas mitigation in animal production: towards an integrated life cycle sustainability assessment	Current Opinion in Environmental Sustainability	ScienceDirect		x
87	Laurence Stamford, Adisa Azapagic	2014	Life cycle sustainability assessment of UK electricity scenarios to 2070	Energy for Sustainable Development	ScienceDirect				x
88	Yue Moriizumi, Naohiro Matsui, Hiroki Hondo	2010	Simplified life cycle sustainability assessment of mangrove management: a case of plantation on wastelands in Thailand	Journal of Cleaner Production	ScienceDirect				x
89	Julia Martínez-Blanco, Annekatrin Lehmann, Pere Muñoz, Assumpció Antón, Marzia Traverso, Joan Rieradevall, Matthias Finkbeiner	2014	Application challenges for the social Life Cycle Assessment of fertilizers within life cycle sustainability assessment	Journal of Cleaner Production	ScienceDirect				x
90	H.K. Jeswani and A. Azapagic	2012	2 - Life cycle sustainability assessment of second generation biodiesel	In Woodhead Publishing Series in Energy	ScienceDirect				x
91	Murat Kucukvar, Serkan Gumus, Gokhan Egilmez, Omer Tatari	2014	Ranking the sustainability performance of pavements: An intuitionistic fuzzy decision making method	Automation in Construction	ScienceDirect		x
92	Rob Hoogmartens, Steven Van Passel, Karel Van Acker, Maarten Dubois	2014	Bridging the gap between LCA	LCC and CBA as sustainability assessment tools	ScienceDirect				x
93	Alessandro Manzardo, Jingzheng Ren, Anna Mazzi, Antonio Scipioni	2012	A grey-based group decision-making methodology for the selection of hydrogen technologies in life cycle sustainability perspective	International Journal of Hydrogen Energy	ScienceDirect				x
94	Deyi Hou, Abir Al-Tabbaa, Peter Guthrie, Jan Hellings, Qingbao Gu	2014	Using a hybrid LCA method to evaluate the sustainability of sediment remediation at the London Olympic Park	Journal of Cleaner Production	ScienceDirect	x
95	A. Azapagic and H. Stichnothe	2011	3 - Life cycle sustainability assessment of biofuels	In Woodhead Publishing Series in Energy	ScienceDirect				x
96	Laurence Stamford, Adisa Azapagic	2011	Sustainability indicators for the assessment of nuclear power	Energy	ScienceDirect			x
97	Zupeng Zhou, Hua Jiang, Liancheng Qin	2007	Life cycle sustainability assessment of fuels	Fuel	ScienceDirect				x
98	Charles Nzila, Jo Dewulf, Henri Spanjers, David Tuigong, Henry Kiriamiti, Herman van Langenhove	2012	Multi criteria sustainability assessment of biogas production in Kenya	Applied Energy	ScienceDirect				x
99	Di Lu, Matthew J. Realff	2013	The Design of a Sustainability Assessment Standard Using Life Cycle Information	Journal of Industrial Ecology	WileyOnline			x
100	T. O'Shea, J. S. Golden, L. Olander	2013	Sustainability and Earth Resources: Life Cycle Assessment Modeling	Business Strategy and the Environment	WileyOnline		x
101	Laurence Stamford, Adisa Azapagic	2012	Life cycle sustainability assessment of electricity options for the UK	International Journal of Energy Research	WileyOnline				x
102	Eskinder D. Gemechu, Christoph Helbig, Guido Sonnemann, Andrea Thorenz, Axel Tuma	2015	Import-based Indicator for the Geopolitical Supply Risk of Raw Materials in Life Cycle Sustainability Assessments	Journal of Industrial Ecology	WileyOnline			x
103	Adisa Azapagic	2010	Assessing Environmental Sustainability: Life Cycle Thinking and Life Cycle Assessment	Sustainable Development in Practice	WileyOnline	x
104	Nicole R. Weber, Johannes Strobel, Melissa A. Dyehouse, Constance Harris, Ray David, Jun Fang, Inez Hua	2014	First-Year Students' Environmental Awareness and Understanding of Environmental Sustainability Through a Life Cycle Assessment Module	Journal of Engineering Education	WileyOnline	x
105	Ivan C̆adez̆, Sascha Hofmann	2013	Anforderungen an die Bewertung der Nachhaltigkeit von Straßenbauwerken	Bautechnik	WileyOnline	x
106	Ulrike Kuhlmann, Philippa Maier, Heinz Friedrich, Rolf Kaschner, Martin Mensinger, Marjolaine Pfaffinger, Klaus Sedlbauer, Matthias Fischer, Tabea Beck, Thomas Ummenhofer, Tim Zinke	2011	Ganzheitliche Bewertung von Stahl- und Verbundbrücken nach Kriterien der Nachhaltigkeit	Stahlbau	WileyOnline	x
107	Mohannad Shuaib, Daniel Seevers, Xiangxue Zhang, Fazleena Badurdeen, Keith E. Rouch, I.S. Jawahir	2014	Product Sustainability Index (ProdSI)	Journal of Industrial Ecology	WileyOnline				x
108	Thomas Ummenhofer, Tim Zinke	2014	Nachhaltigkeit und Resilienz – Zukünftige Kriterien bei der integrativen Bewertung von Brücken	Stahlbau	WileyOnline	x
109	Ulrike Kuhlmann, Philippa Maier, Heinz Friedrich, Rolf Kaschner, Martin Mensinger, Marjolaine Pfaffinger, Klaus Sedlbauer, Matthias Fischer, Katrin Lenz, Tabea Beck, Thomas Ummenhofer, Tim Zinke	2013	Instandhaltungsstrategien als Basis für die ganzheitliche Bewertung von Stahl- und Verbundbrücken nach Kriterien der Nachhaltigkeit	Stahlbau	WileyOnline	x
110	Matthias Schulz, Michael D Short, Gregory M Peters	2012	A streamlined sustainability assessment tool for improved decision making in the urban water industry	Integrated Environmental Assessment and Management	WileyOnline				x
111	André Véronique, Cepeda Carlos, Harry Vinters, Gary Mathern, Michael Levine	2006	Monday, December 4, 2006 Poster Session IV 7:30 a.m. – 4:30 p.m.	Epilepsia	WileyOnline	x
112	Ulrike Kuhlmann, Philippa Maier, Tim Zinke, Thomas Ummenhofer, Marjolaine Pfaffinger, Martin Mensinger, Sarah Schneider, Katrin Lenz, Tabea Beck, Heinz Friedrich	2014	Nachhaltigkeitsanalysen von Stahlverbundbrücken	Stahlbau	WileyOnline	x
113	Walter Klöpffer, Birgit Grahl	2014	From LCA to Sustainability Assessment	Life Cycle Assessment (LCA)	WileyOnline				x
114	Marzia Traverso, Matthias Finkbeiner, Andreas Jørgensen, Laura Schneider	2012	Life Cycle Sustainability Dashboard	Journal of Industrial Ecology	WileyOnline				x
115	Paul Floerke, Sonja Weiß, Dieter Ungermann, Alena Schütz, Mike Gralla, Tim Brandt, Thomas Ummenhofer, Tim Zinke, Christoph Herrmann, Tina Dettmer, Karsten Tichelmann, Bastian Ziegler	2011	Bauen im Bestand – Potenziale und Chancen der Stahl-/Stahlleichtbauweise	Stahlbau	WileyOnline	x
116	Markus Kuhnhenne, Bernd Döring, Ronald Kocker, Dominik Pyschny, Markus Feldmann	2010	Die Ökobilanz als Baustein der Nachhaltigkeitsbewertung im Industrie- und Gewerbebau	Stahlbau	WileyOnline	x
117	Anna Irene De Luca, Nathalie Iofrida, Alfio Strano, Giacomo Falcone, Giovanni Gulisano	2015	Social life cycle assessment and participatory approaches: A methodological proposal applied to citrus farming in Southern Italy	Integrated Environmental Assessment and Management	WileyOnline	x
118	Umberto Berardi	2012	Sustainability Assessment in the Construction Sector: Rating Systems and Rated Buildings	Sustainable Development	WileyOnline		x
119	Melissa A. Harclerode, Pankaj Lal, Michael E. Miller	2013	Estimating Social Impacts of a Remediation Project Life Cycle With Environmental Footprint Evaluation Tools	Remediation Journal	WileyOnline	x
120	Jo Dewulf, Lucia Mancini, Gian Andrea Blengini, Serenella Sala, Cynthia Latunussa, David Pennington	2015	Toward an Overall Analytical Framework for the Integrated Sustainability Assessment of the Production and Supply of Raw Materials and Primary Energy Carriers	Journal of Industrial Ecology	WileyOnline				x
121	Dieter Ungermann, Alena Patschin, Anja Pätzold, Eva Preckwinkel, Paul Floerke, Sonja Weiß, Mike Gralla, Tim Brandt, Thomas Ummenhofer, Manfred Hermann, Tim Zinke, Christoph Herrmann, Tina Dettmer, Karsten Ulrich Tichelmann, Bastian Ziegler	2014	Integrale Analyse von Bestandsbaumaßnahmen und vergleichende Nachhaltigkeitsbewertung	Stahlbau	WileyOnline	x
122	Heui-seok Yi, Jorge L. Hau, Nandan U. Ukidwe, Bhavik R. Bakshi	2004	Hierarchical thermodynamic metrics for evaluating the environmental sustainability of industrial processes	Environmental Progress	WileyOnline	x
123	Henrik Ny, Sophie Hallstedt, Karl-Henrik Robèrt, Göran Broman	2008	Introducing Templates for Sustainable Product Development	Journal of Industrial Ecology	WileyOnline			x
124	Renee Wever, Joost Vogtländer	2013	Eco-efficient Value Creation: An Alternative Perspective on Packaging and Sustainability	Packaging Technology and Science	WileyOnline	x
125	Tobias Luthe, Thomas Kägi, Jan Reger	2013	A Systems Approach to Sustainable Technical Product Design	Journal of Industrial Ecology	WileyOnline				x
126	Bryony Cunningham, Nigel Battersby, Walter Wehrmeyer, Catriona Fothergill	2003	A Sustainability Assessment of a Biolubricant	Journal of Industrial Ecology	WileyOnline			x
127	Akshay D. Patel, Koen Meesters, Herman den Uil, Ed de Jong, Ernst Worrell, Martin K. Patel	2013	Early-Stage Comparative Sustainability Assessment of New Bio-based Processes	ChemSusChem	WileyOnline		x
128	Hans-Dieter Hegner	2010	Nachhaltiges Bauen in Deutschland – Bewertungssystem des Bundes für Büro- und Verwaltungsbauten	Stahlbau	WileyOnline	x
129	Helen Lewis, Karli Verghese, Leanne Fitzpatrick	2010	Evaluating the sustainability impacts of packaging: the plastic carry bag dilemma	Packaging Technology and Science	WileyOnline			x
130	Edward Curry, Brian Donnellan	2012	Sustainable Information Systems and Green Metrics	Harnessing Green It	WileyOnline		x
131	Stefan Hirschberg, Peter Burgherr	2015	Sustainability Assessment for Energy Technologies	Handbook of Clean Energy Systems	WileyOnline				x
132	Alessandro Tugnoli, Valerio Cozzani, Francesco Santarelli	2013	Supporting Process Design by a Sustainability KPIs Methodology	Management Principles of Sustainable Industrial Chemistry	WileyOnline				x
133	Xun Jin, Karen A. High	2004	A new conceptual hierarchy for identifying environmental sustainability metrics	Environmental Progress	WileyOnline	x
134	Fred Lemke, João Pedro Pereira Luzio	2014	Exploring Green Consumers’ Mind-Set toward Green Product Design and Life Cycle Assessment	Journal of Industrial Ecology	WileyOnline	x
135	Martin Hedesström, Ulrika Lundqvist, Anders Biel	2011	Investigating consistency of judgement across sustainability analyst organizations	Sustainable Development	WileyOnline	x
136	Henrik Ny, Jamie P. MacDonald, Göran Broman, Ryoichi Yamamoto, Karl-Henrik Robért	2006	Sustainability Constraints as System Boundaries: An Approach to Making Life-Cycle Management Strategic	Journal of Industrial Ecology	WileyOnline			x
137	Jin Yang, Bin Chen	2015	Life Cycle Assessment of Wind Power Generation System	Handbook of Clean Energy Systems	WileyOnline	x
138	David Brennan	2007	Life-Cycle Evaluation of Chemical Processing Plants	Environmentally Conscious Materials and Chemicals Processing	WileyOnline	x
139	David Styles, James Gibbons, Arwel P. Williams, Jens Dauber, Heinz Stichnothe, Barbara Urban, David R. Chadwick, Davey L. Jones	2015	Consequential life cycle assessment of biogas	GCB Bioenergy	WileyOnline	x
140	Wesley W. Ingwersen	2011	Emergy as a Life Cycle Impact Assessment Indicator	Journal of Industrial Ecology	WileyOnline	x
141	Fionnuala Murphy, Kevin McDonnell, Colette C. Fagan	2014	Sustainability and Environmental Issues in Food Processing	Food Processing	WileyOnline		x
142	Catherine Benoît Norris	2012	Social Life Cycle Assessment: A Technique Providing a New Wealth of Information to Inform Sustainability-Related Decision Making	Life Cycle Assessment Handbook	WileyOnline	x
143	Ioannis G. Economou, Efstratios N. Pistikopoulos, Jen-Pei Liu, Yoshiaki Kawajiri, Krist V. Gernaey, John M. Woodley, Concepción Jiménez-González, René Bañares-Alcántara	2000	Process Systems Engineering	Ullmann's Encyclopedia of Industrial Chemistry	WileyOnline	x
144	Michael Tsang, Cate Fox-Lent, Sean Wallace, Tim Welp, Matthew Bates, Igor Linkov	2015	Life-cycle impacts of soybean and algae biodiesel: Case study of US marine vessels	Biofuels	WileyOnline	x
145	Serenella Sala, Malgorzata Goralczyk	2013	Chemical footprint: A methodological framework for bridging life cycle assessment and planetary boundaries for chemical pollution	Integrated Environmental Assessment and Management	WileyOnline	x
146	George M. Hall, Sevim Köse	2014	Fish Processing Installations: Sustainable Operation	Seafood Processing	WileyOnline	x
147	David V. Spitzley, Duane A. Tolle	2004	Evaluating Land-Use Impacts: Selection of Surface Area Metrics for Life-Cycle Assessment of Mining	Journal of Industrial Ecology	WileyOnline	x
148	Stefan A. Seuring, Julia Koplin, Torsten Behrens, Uwe Schneidewind	2003	Sustainability assessment in the German detergent industry: from stakeholder involvement to sustainability indicators	Sustainable Development	WileyOnline			x
149	J. Michael Davis	2013	A comprehensive environmental assessment approach to engineered nanomaterials	Wiley Interdisciplinary Reviews: Nanomedicine and Nanobiotechnology	WileyOnline	x
150	Ibrahim Dincer	2007	Environmental and sustainability aspects of hydrogen and fuel cell systems	International Journal of Energy Research	WileyOnline		x
151	Kaisa Grönman, Risto Soukka, Terhen Järvi-Kääriäinen, Juha-Matti Katajajuuri, Mika Kuisma, Heta-Kaisa Koivupuro, Margareetta Ollila, Marja Pitkänen, Olli Miettinen, Frans Silvenius, Rabbe Thun, Helena Wessman, Lassi Linnanen	2013	Framework for Sustainable Food Packaging Design	Packaging Technology and Science	WileyOnline	x
152	Ash Genaidy, Waldemar Karwowski	2008	A roadmap for a methodology to assess	Human Factors and Ergonomics in Manufacturing & Service Industries	WileyOnline	x
153	Lijiang Huo, Katsuhiko Saito	2009	Multidimensional life cycle assessment on various moulded pulp production systems	Packaging Technology and Science	WileyOnline	x
154	Carin Labuschagne, Alan C. Brent, Schalk J. Claasen	2005	Environmental and social impact considerations for sustainable project life cycle management in the process industry	Corporate Social Responsibility and Environmental Management	WileyOnline			x
155	Anders Bjørn, Michael Z. Hauschild	2013	Absolute versus Relative Environmental Sustainability	Journal of Industrial Ecology	WileyOnline	x
156	Mary Ann Curran	2004	The status of life-cycle assessment as an environmental management tool	Environmental Progress	WileyOnline	x
157	Massimo Pizzol	2015	Life Cycle Assessment and the Resilience of Product Systems	Journal of Industrial Ecology	WileyOnline	x
158	Ling Cao, James S. Diana, Gregory A. Keoleian	2013	Role of life cycle assessment in sustainable aquaculture	Reviews in Aquaculture	WileyOnline	x
159	Alexandra Ewing, Lanka Thabrew, Debra Perrone, Mark Abkowitz, George Hornberger	2011	Insights on the Use of Hybrid Life Cycle Assessment for Environmental Footprinting	Journal of Industrial Ecology	WileyOnline	x
160	Jennifer F Helgeson, Barbara C Lippiatt	2009	Multidisciplinary life cycle metrics and tools for green buildings	Integrated Environmental Assessment and Management	WileyOnline	x
161	Gregor Wernet, Christopher Mutel, Stefanie Hellweg, Konrad Hungerbühler	2011	The Environmental Importance of Energy Use in Chemical Production	Journal of Industrial Ecology	WileyOnline	x
162	J. W. Owens	2001	Water Resources in Life-Cycle Impact Assessment: Considerations in Choosing Category Indicators	Journal of Industrial Ecology	WileyOnline	x
163	Shawn Hunter, Richard Helling, Dawn Shiang	2012	Integration of LCA and Life-Cycle Thinking within the Themes of Sustainable Chemistry & Engineering	Life Cycle Assessment Handbook	WileyOnline	x
164	fib	2013	Basic Principles	fib Model Code for Concrete Structures 2010	WileyOnline	x
165	Nathan Pelletier, Peter Tyedmers	2011	An Ecological Economic Critique of the Use of Market Information in Life Cycle Assessment Research	Journal of Industrial Ecology	WileyOnline	x
166	Adisa Azapagic	2006	Life Cycle Assessment as an Environmental Sustainability Tool	Renewables-Based Technology	WileyOnline	x
167	Michael Tolinski	2011	The Life Cycles of Plastics	Plastics and Sustainability	WileyOnline	x
168	Evert Nieuwlaar, Erik Alsema	1998	PV power systems and the environment: results of an expert workshop	Progress in Photovoltaics: Research and Applications	WileyOnline	x
169	Anoop Singh, Stig Irving Olsen, Poonam Singh Nigam	2011	A viable technology to generate third-generation biofuel	Journal of Chemical Technology & Biotechnology	WileyOnline	x
170	Man Kee Lam, Keat Teong Lee, Abdul Rahman Mohamed	2009	Life cycle assessment for the production of biodiesel: A case study in Malaysia for palm oil versus jatropha oil	Biofuels	WileyOnline	x
171	Bastian Wittstock, Stefan Albrecht, Cecilia Makishi Colodel, Jan Paul Lindner	2009	Gebäude aus Lebenszyklusperspektive – Ökobilanzen im Bauwesen	Bauphysik	WileyOnline	x
172	Julia Hansson, Fredrik Martinsson, Mathias Gustavsson	2015	Greenhouse gas performance of heat and electricity from wood pellet value chains – based on pellets for the Swedish market	Biofuels	WileyOnline	x
173	Felix Creutzig, N. H. Ravindranath, Göran Berndes, Simon Bolwig, Ryan Bright, Francesco Cherubini, Helena Chum, Esteve Corbera, Mark Delucchi, Andre Faaij, Joseph Fargione, Helmut Haberl, Garvin Heath, Oswaldo Lucon, Richard Plevin, Alexander Popp, Carmenza Robledo-Abad, Steven Rose, Pete Smith, Anders Stromman, Sangwon Suh, Omar Masera	2014	Bioenergy and climate change mitigation: an assessment	GCB Bioenergy	WileyOnline	x
174	Joana M. Comas Martí, Ralf W. Seifert	2013	Assessing the Comprehensiveness of Supply Chain Environmental Strategies	Business Strategy and the Environment	WileyOnline	x
175	Horacio A. Aguirre-Villegas, Rebecca Larson, Douglas J. Reinemann	2015	Effects of management and co-digestion on life cycle emissions and energy from anaerobic digestion	Greenhouse Gases: Science and Technology	WileyOnline	x
176	Nitaigour P. Mahalik, Tony Au	2008	LCDA from industrial systems using control network: A monitoring and assessment scheme for sustainability	Environmental Progress	WileyOnline	x
177	John L. Field, Catherine M. H. Keske, Greta L. Birch, Morgan W. DeFoort, M. Francesca Cotrufo	2013	Distributed biochar and bioenergy coproduction: a regionally specific case study of environmental benefits and economic impacts	GCB Bioenergy	WileyOnline	x
178	Ryuji Matsuhashi, Hisashi Ishitani	2000	Evaluation of energy technologies to realize sustainable systems	Electrical Engineering in Japan	WileyOnline	x
179	Sara González-García, Almudena Hospido, Roland Agnemo, Patrik Svensson, Eva Selling, Ma Teresa Moreira, Gumersindo Feijoo	2011	Environmental Life Cycle Assessment of a Swedish Dissolving Pulp Mill Integrated Biorefinery	Journal of Industrial Ecology	WileyOnline	x
180	Aysin Sev	2009	How can the construction industry contribute to sustainable development? A conceptual framework	Sustainable Development	WileyOnline	x
181	Ina Sell, Denise Ott, Dana Kralisch	2014	Life Cycle Cost Analysis as Decision Support Tool in Chemical Process Development	ChemBioEng Reviews	WileyOnline	x
182	Mary Haropoulou, Clive Smallman, Jack Radford	2013	Supply Chain Management and the Delivery of Ecosystems Services in Manufacturing	Ecosystem Services in Agricultural and Urban Landscapes	WileyOnline	x
183	Angela G. Silva, Richard Carter, Felipe L. M. Merss, Diego O. Corrêa, Jose V. C. Vargas, André B. Mariano, Juan C. Ordonez, Marisa D. Scherer	2015	Life cycle assessment of biomass production in microalgae compact photobioreactors	GCB Bioenergy	WileyOnline	x
184	Professor Richard Welford	1993	Breaking the link between quality and the environment: Auditing for sustainability and life cycle assessment	Business Strategy and the Environment	WileyOnline	x
185	Jasim Ahmed, Tanweer Alam	2013	Concept of Sustainable Packaging System and Its Development	Sustainable Food Processing	WileyOnline		x
186	Ricky Speck, Susan Selke, Rafael Auras, James Fitzsimmons	2015	Choice of Life Cycle Assessment Software Can Impact Packaging System Decisions	Packaging Technology and Science	WileyOnline	x
187	Carl-Alexander Graubner, Achim Knauff, Eberhard Pelke	2011	Lebenszyklusbetrachtungen als Grundlage für die Nachhaltigkeitsbewertung von Straßenbrücken	Stahlbau	WileyOnline	x
188	M. E. Watt, A. J. Johnson, M. Ellis, H. R. Outhred	1998	Life-cycle air emissions from PV power systems	Progress in Photovoltaics: Research and Applications	WileyOnline	x
189	Pragnya L. Eranki, David H. Manowitz, Bryan D. Bals, R. César Izaurralde, Seungdo Kim, Bruce E. Dale	2013	The watershed-scale optimized and rearranged landscape design (WORLD) model and local biomass processing depots for sustainable biofuel production: Integrated life cycle assessments	Biofuels	WileyOnline	x
190	Thomas Koellner, Sangwon Suh, Olaf Weber, Corinne Moser, Roland W. Scholz	2007	Environmental Impacts of Conventional and Sustainable Investment Funds Compared Using Input-Output Life-Cycle Assessment	Journal of Industrial Ecology	WileyOnline	x
191	Smitha Sundaram, Dana Kralisch, Qi Wang, Volker Hessel	2015	Sustainability lessons from practice: how flow intensification can trigger sustainability and modular plant technology in EU projects	Asia-Pacific Journal of Chemical Engineering	WileyOnline	x
192	Matthew J. Thorn, Jennifer L. Kraus, Denise R. Parker	2011	Life-cycle assessment as a sustainability management tool: Strengths	Environmental Quality Management	WileyOnline	x
193	C. Robert Kenley, James Nail	2005	3.3.1 Quantifying Cost Risk Early in the Life Cycle	INCOSE International Symposium	WileyOnline	x
194	Cesare Castellini, Antonio Boggia, Luisa Paolotti, Greg J. Thoma, Dae-soo Kim	2012	Environmental Impacts and Life Cycle Analysis of Organic Meat Production and Processing	Organic Meat Production and Processing	WileyOnline	x
195	Friederike Ziegler, Andreas Emanuelsson, John Lucas Eichelsheim, Anna Flysjö, Vaque Ndiaye, Mikkel Thrane	2011	Extended Life Cycle Assessment of Southern Pink Shrimp Products Originating in Senegalese Artisanal and Industrial Fisheries for Export to Europe	Journal of Industrial Ecology	WileyOnline	x
196	Sean Lockie	2015	Life Cycle Costing and Sustainability Assessments	Design Economics for the Built Environment	WileyOnline		x
197	Jeffrey Morris, H. Scott Matthews	2010	Development of a Consumer Environmental Index and Results for Washington State Consumers	Journal of Industrial Ecology	WileyOnline	x
198	Wouter M. J. Achten, Koen Dillen, Antonio Trabucco, Bruno Verbist, Lode Messemaker, Bart Muys, Erik Mathijs	2015	The economics and greenhouse gas balance of land conversion to Jatropha: the case of Tanzania	GCB Bioenergy	WileyOnline	x
199	Bjørn Ludwig	1997	The concept of technology assessment – an entire process to sustainable development	Sustainable Development	WileyOnline	x
200	Shabbir H. Gheewala, Beau Damen, Xunpeng Shi	2013	Biofuels: economic, environmental and social benefits and costs for developing countries in Asia	Wiley Interdisciplinary Reviews: Climate Change	WileyOnline			x
201	JEANETTE WHITAKER, KATHERINE E. LUDLEY, REBECCA ROWE, GAIL TAYLOR, DAVID C. HOWARD	2010	Sources of variability in greenhouse gas and energy balances for biofuel production: a systematic review	GCB Bioenergy	WileyOnline	x
202	George M. Hall	2010	Sustainability Impacts of Fish-Processing Operations	Fish Processing	WileyOnline	x
203	Sibylle D. Frey, David J. Harrison, Eric H. Billett	2006	Ecological Footprint Analysis Applied to Mobile Phones	Journal of Industrial Ecology	WileyOnline	x
204	Marjolein Helder, Wei-Shan Chen, Eugenie J.M. van der Harst, David P.B.T.B. Strik, Hubertus (Bert) V.M. Hamelers, Cees J.N. Buisman, José Potting	2013	Electricity production with living plants on a green roof: environmental performance of the plant-microbial fuel cell	Biofuels	WileyOnline	x
205	marjit Sahota	2013	Environmental Impacts of Cosmetic Products	Sustainability: How the Cosmetics Industry is Greening Up	WileyOnline	x
206	Stefan Majer, Franziska Mueller-Langer, Vanessa Zeller, Martin Kaltschmitt	2009	Implications of biodiesel production and utilisation on global climate – A literature review	European Journal of Lipid Science and Technology	WileyOnline		x
207	Javier Santillan, Mark S. Heaston, David S. Woodward, Manish M. Joshi	2010	Environmental impacts associated with manufacturing of solar and wind power alternative energy systems	Remediation Journal	WileyOnline	x
208	Oral S. Saulters, Larry E. Erickson, Blase A. Leven, John A. Pickrel, Ryan M. Green, Leslie Jamka, Amanda Prill	2010	Enhancing technology development through integrated environmental analysis: Toward sustainable nonlethal military systems	Integrated Environmental Assessment and Management	WileyOnline	x
209	Maria R. C. De Sousa, Franco A. Montalto, Sabrina Spatari	2012	Using Life Cycle Assessment to Evaluate Green and Grey Combined Sewer Overflow Control Strategies	Journal of Industrial Ecology	WileyOnline	x
210	Davide Tonini, Lorie Hamelin, Thomas Fruergaard Astrup	2015	Environmental implications of the use of agro-industrial residues for biorefineries: application of a deterministic model for indirect land-use changes	GCB Bioenergy	WileyOnline	x
211	Per Christensen	1997	DIFFERENT LIFESTYLES AND THEIR IMPACT ON THE ENVIRONMENT	Sustainable Development	WileyOnline	x
212	Joost C. Walraven, Agnieszka Bigaj-van Vliet	2011	The 2010 fib Model Code for Structural Concrete: a new approach to structural engineering	Structural Concrete	WileyOnline	x
213	Anu Ramaswami, Christopher Weible, Deborah Main, Tanya Heikkila, Saba Siddiki, Andrew Duvall, Andrew Pattison, Meghan Bernard	2012	A Social-Ecological-Infrastructural Systems Framework for Interdisciplinary Study of Sustainable City Systems	Journal of Industrial Ecology	WileyOnline	x
214	Jhuma Sadhukhan, Kok Siew Ng, Elias Martinez Hernandez	2014	Data Uncertainty and Multicriteria Analyses	Biorefineries and Chemical Processes	WileyOnline	x
215	Jacopo Giuntoli, Aikaterini K. Boulamanti, Sara Corrado, Mahsa Motegh, Alessandro Agostini, David Baxter	2013	Environmental impacts of future bioenergy pathways: the case of electricity from wheat straw bales and pellets	GCB Bioenergy	WileyOnline	x
216	Philip Sinclair, Eleni Papathanasopoulou, Warren Mellor, Tim Jackson	2005	Towards an Integrated Regional Materials Flow Accounting Model	Journal of Industrial Ecology	WileyOnline	x
217	Pham Ngoc Bao, Toshiya Aramaki, Keisuke Hanaki	2013	Assessment of stakeholders’ preferences towards sustainable sanitation scenarios	Water and Environment Journal	WileyOnline	x
218	Rosemary S Hails	2001	Environmental Impact of Genetically Modified Organisms (GMOs)	eLS	WileyOnline	x
219	Ben Brehmer, Johan Sanders	2009	Assessing the current Brazilian sugarcane industry and directing developments for maximum fossil fuel mitigation for the international petrochemical market	Biofuels	WileyOnline	x
220	Corinne Baulcomb	2013	Aquaculture and Ecosystem Services	Ecosystem Services in Agricultural and Urban Landscapes	WileyOnline	x
221	Roland Hischier	2011	ecoinvent – eine konsistente, transparente und qualitätsgesicherte Hintergrunddatenbank für Ökobilanzen & Co	Chemie Ingenieur Technik	WileyOnline	x
222	Tapas K. Das, Carl Houtman	2004	Evaluating chemical-	Environmental Progress	WileyOnline	x
223	Gregory M. Bohlmann	2004	Biodegradable packaging life-cycle assessment	Environmental Progress	WileyOnline		x
224	X. ZHANG, R.C. IZAURRALDE, D. MANOWITZ, T. O. WEST, W. M. POST, A. M. THOMSON, V. P. BANDARU, J. NICHOLS, J. R. WILLIAMS	2010	An integrative modeling framework to evaluate the productivity and sustainability of biofuel crop production systems	GCB Bioenergy	WileyOnline	x
225	Matthew Aylott, Adrian Higson, Geraint Evans, Alison Hamer, Nigel Mortimer	2011	What is the most appropriate LCA method for measuring greenhouse gas emissions from bioenergy?	Biofuels	WileyOnline	x
226	Reid A. Miner, Alan A. Lucier	1994	Considerations in performing life-cycle assessments on forest products	Environmental Toxicology and Chemistry	WileyOnline	x
227	Amy A. Costello, Marsha S. Bischel	2013	Directional Drivers of Sustainable Manufacturing: The Impact of Sustainable Building Codes and Standards on the Manufacturers of Materials	Advances in Materials Science for Environmental and Energy Technologies II	WileyOnline	x
228	R A Wilbey	2007	The Guide on Life Cycle Assessment Towards Sustainability in the Dairy Chain - by International Dairy Federation (IDF)	International Journal of Dairy Technology	WileyOnline		x
229	Hans-Dieter Hegner, Nicolas Kerz	2010	Nachhaltiges Bauen in Deutschland — Bewertungsystem des Bundes für Büro- und Verwaltungsbauten	Mauerwerk	WileyOnline	x
230	Wayne Martindale	2014	Challenges and Solutions	Global Food Security and Supply	WileyOnline	x
231	Eduard Cubi, Nicholas F. Zibin, Sarah J. Thompson, Joule Bergerson	2015	Sustainability of Rooftop Technologies in Cold Climates: Comparative Life Cycle Assessment of White Roofs	Journal of Industrial Ecology	WileyOnline	x
232	Jose G. Guzman, Rattan Lal, Shana Byrd, Steven I. Apfelbaum, Ry. L. Thompson	2014	CARBON LIFE CYCLE ASSESSMENT FOR PRAIRIE AS A CROP IN RECLAIMED MINE LAND	Land Degradation & Development	WileyOnline	x
233	D. G. Jones, K. Lyon Reid, D. G. Gilbert	2008	Sustainability Assessment Considering Asset and Building Life Cycles	Smart & Sustainable Built Environments	WileyOnline		x
234	Emanuele Lugato, Francesco P. Vaccari, Lorenzo Genesio, Silvia Baronti, Alessandro Pozzi, Mireille Rack, Jeremy Woods, Gianluca Simonetti, Luca Montanarella, Franco Miglietta	2013	An energy-biochar chain involving biomass gasification and rice cultivation in Northern Italy	GCB Bioenergy	WileyOnline	x
235	Erik R. Coats, Erin Searcy, Kevin Feris, Dev Shrestha, Armando G. McDonald, Aurelio Briones, Timothy Magnuson, Maxine Prior	2013	An integrated two-stage anaerobic digestion and biofuel production process to reduce life cycle GHG emissions from US dairies	Biofuels	WileyOnline	x
236	Joseph P. Greene	2014	Sustainable Strategies for Plastics Companies	Sustainable Plastics	WileyOnline	x
237	C. D. Golden, R. W. Wrangham, J. S. Brashares	2013	Assessing the accuracy of interviewed recall for rare	Animal Conservation	WileyOnline	x
238	Pierre Gallezot	2008	Catalytic Conversion of Biomass: Challenges and Issues	ChemSusChem	WileyOnline	x
239	Roar R. Søndergaard, Markus Hösel, Nieves Espinosa, Mikkel Jørgensen, Frederik C. Krebs	2013	Practical evaluation of organic polymer thermoelectrics by large-area R2R processing on flexible substrates	Energy Science & Engineering	WileyOnline	x
240	Jose A. Mendiola, María Castro-Puyana, Miguel Herrero, Elena Ibáñez	2013	Green Foodomics	Foodomics	WileyOnline	x
241	Patricia Y. Oikawa, G. Darrel Jenerette, David A. Grantz	2014	Offsetting high water demands with high productivity: Sorghum as a biofuel crop in a high irradiance arid ecosystem	GCB Bioenergy	WileyOnline	x
242	Heinrich Bastert	2011	Nachhaltigkeitsbewertung von Gebäuden	Mauerwerk	WileyOnline			x
243	Waheed, Bushra; Khan, Faisal; Veitch, Brian	2009	Linkage-Based Frameworks for Sustainability Assessment: Making a Case for Driving Force-Pressure-State-Exposure-Effect-Action (DPSEEA) Frameworks	Sustainability	MDPI		x
244	Khasreen, Mohamad; Banfill, Phillip F.; Menzies, Gillian	2009	Life-Cycle Assessment and the Environmental Impact of Buildings: A Review	Sustainability	MDPI	x
245	Mousazadeh, Hossein; Keyhani, Alireza; Mobli, Hossein; Bardi, Ugo; El Asmar, Toufic	2009	Sustainability in Agricultural Mechanization: Assessment of a Combined Photovoltaic and Electric Multipurpose System for Farmers	Sustainability	MDPI	x
246	Straka, Thomas; Layton, Patricia	2010	Natural Resources Management: Life Cycle Assessment and Forest Certification and Sustainability Issues	Sustainability	MDPI	x
247	Bragança, Luís; Mateus, Ricardo; Koukkari, Heli	2010	Building Sustainability Assessment	Sustainability	MDPI	x
248	Gunneberg, Ben	2010	Comments on ‘Straka, T.J.; Layton, P.A. Natural Resources Management: Life Cycle Assessment and Forest Certification and Sustainability Issues. Sustainability 2010, 2, 604–623’	Sustainability	MDPI	x
249	Finkbeiner, Matthias; Schau, Erwin M.; Lehmann, Annekatrin; Traverso, Marzia	2010	Towards Life Cycle Sustainability Assessment	Sustainability	MDPI				x
250	Dhingra, Rajive; Naidu, Sasikumar; Upreti, Girish; Sawhney, Rapinder	2010	Sustainable Nanotechnology: Through Green Methods and Life-Cycle Thinking	Sustainability	MDPI	x
251	Brandão, Miguel; Clift, Roland; Canals, Llorenç Milà i; Basson, Lauren	2010	A Life-Cycle Approach to Characterising Environmental and Economic Impacts of Multifunctional Land-Use Systems: An Integrated Assessment in the UK	Sustainability	MDPI				x
252	Halog, Anthony; Manik, Yosef	2011	Advancing Integrated Systems Modelling Framework for Life Cycle Sustainability Assessment	Sustainability	MDPI				x
253	Lehmann, Annekatrin; Russi, Daniela; Bala, Alba; Finkbeiner, Matthias; Fullana-i-Palmer, Pere	2011	Integration of Social Aspects in Decision Support, Based on Life Cycle Thinking	Sustainability	MDPI	x
254	Schau, Erwin M.; Traverso, Marzia; Lehmann, Annekatrin; Finkbeiner, Matthias	2011	Life Cycle Costing in Sustainability Assessment—A Case Study of Remanufactured Alternators	Sustainability	MDPI	x
255	Rosen, Marc A.; Kishawy, Hossam A.	2012	Sustainable Manufacturing and Design: Concepts, Practices and Needs	Sustainability	MDPI	x
256	Sala, Serenella; Pant, Rana; Hauschild, Michael; Pennington, David	2012	Research Needs and Challenges from Science to Decision Support. Lesson Learnt from the Development of the International Reference Life Cycle Data System (ILCD) Recommendations for Life Cycle Impact Assessment	Sustainability	MDPI	x
257	Benoit-Norris, Catherine; Cavan, Deana Aulisio; Norris, Gregory	2012	Identifying Social Impacts in Product Supply Chains:Overview and Application of the Social Hotspot Database	Sustainability	MDPI	x
258	Kuusiola, Timo; Wierink, Maaria; Heiskanen, Kari	2012	Comparison of Collection Schemes of Municipal Solid Waste Metallic Fraction: The Impacts on Global Warming Potential for the Case of the Helsinki Metropolitan Area, Finland	Sustainability	MDPI	x
259	Kissinger, Meidad; Sussman, Cornelia; Moore, Jennie; Rees, William	2013	Accounting for the Ecological Footprint of Materials in Consumer Goods at the Urban Scale	Sustainability	MDPI	x
260	Holden, Erling; Gilpin, Geoffrey	2013	Biofuels and Sustainable Transport: A Conceptual Discussion	Sustainability	MDPI	x
261	Arcese, Gabriella; Lucchetti, Maria; Merli, Roberto	2013	Social Life Cycle Assessment as a Management Tool: Methodology for Application in Tourism	Sustainability	MDPI	x
262	Oakleaf, James; Kennedy, Christina; Boucher, Timothy; Kiesecker, Joseph	2013	Tailoring Global Data to Guide Corporate Investments in Biodiversity, Environmental Assessments and Sustainability	Sustainability	MDPI	x
263	Caputo, Paola; Ducoli, Chiara; Clementi, Matteo	2014	Strategies and Tools for Eco-Efficient Local Food Supply Scenarios	Sustainability	MDPI	x
264	Ingwersen, Wesley; Cabezas, Heriberto; Weisbrod, Anne; Eason, Tarsha; Demeke, Bayou; Ma, Xin; Hawkins, Troy; Lee, Seung-Jin; Bare, Jane; Ceja, Manuel	2014	Integrated Metrics for Improving the Life Cycle Approach to Assessing Product System Sustainability	Sustainability	MDPI				x
265	Markussen, Mads; Kulak, Michal; Smith, Laurence; Nemecek, Thomas; Østergård, Hanne	2014	Evaluating the Sustainability of a Small-Scale Low-Input Organic Vegetable Supply System in the United Kingdom	Sustainability	MDPI		x
266	Mjörnell, Kristina; Boss, Anna; Lindahl, Markus; Molnar, Stefan	2014	A Tool to Evaluate Different Renovation Alternatives with Regard to Sustainability	Sustainability	MDPI				x
267	Van Hoof, Gert; Weisbrod, Annie; Kruse, Bettina	2014	Assessment of Progressive Product Innovation on Key Environmental Indicators: Pampers® Baby Wipes from 2007–2013	Sustainability	MDPI	x
268	Stefanova, Milena; Tripepi, Concetta; Zamagni, Alessandra; Masoni, Paolo	2014	Goal and Scope in Life Cycle Sustainability Analysis: The Case of Hydrogen Production from Biomass	Sustainability	MDPI				x
269	Ioppolo, Giuseppe; Cucurachi, Stefano; Salomone, Roberta; Saija, Giuseppe; Ciraolo, Luigi	2014	Industrial Ecology and Environmental Lean Management: Lights and Shadows	Sustainability	MDPI	x
270	Torquati, Biancamaria; Venanzi, Sonia; Ciani, Adriano; Diotallevi, Francesco; Tamburi, Vincenzo	2014	Environmental Sustainability and Economic Benefits of Dairy Farm Biogas Energy Production: A Case Study in Umbria	Sustainability	MDPI				x
271	Onat, Nuri; Kucukvar, Murat; Tatari, Omer	2014	Towards Life Cycle Sustainability Assessment of Alternative Passenger Vehicles	Sustainability	MDPI				x
272	Li, Hua; Nitivattananon, Vilas; Li, Peng	2015	Developing a Sustainability Assessment Model to Analyze China’s Municipal Solid Waste Management Enhancement Strategy	Sustainability	MDPI				x
273	Yu, Man; Halog, Anthony	2015	Solar Photovoltaic Development in Australia—A Life Cycle Sustainability Assessment Study	Sustainability	MDPI				x
274	Accorsi, Riccardo; Versari, Lorenzo; Manzini, Riccardo	2015	Glass vs. Plastic: Life Cycle Assessment of Extra-Virgin Olive Oil Bottles across Global Supply Chains	Sustainability	MDPI	x
275	UNEP/SETAC	2011	Towards a Life Cycle Sustainability Assessment - Making informed choices on products	UNEP/SETAC publication	Additionally identified				x
276	Klöpffer, W.	2003	Life-Cycle based methods for sustainable product development.	The International Journal of Life Cycle Assessment	Additionally identified				x
277	Guinée, J. B., Heijungs, R., Huppes, G., Zamagni, A., Masoni, P., Buonamici, R., … Rydberg, T.	2011	Life Cycle Assessment: Past, Present, and Future	Environmental Science & Technology	Additionally identified				x
278	Heijungs, R., Huppes, G., & Guinée, J. B.	2009	A scientific framework for LCA.	Technical report of CALCAS project	Additionally identified				x
279	Ghadimi, P., Azadnia, A. H., Mohd Yusof, N., & Mat Saman, M. Z.	2012	A weighted fuzzy approach for product sustainability assessment: a case study in automotive industry.	Journal of Cleaner Production	Additionally identified				x
280	Heijungs, R., Huppes, G., & Guinée, J. B.	2010	Life cycle assessment and sustainability analysis of products, materials and technologies - Toward a scientific framework for sustainability life cycle analysis.	Polymer Degradation and Stability	Additionally identified				x
				TOTAL	280	173	26	18	63
